# Supplementary material for: Copper-doped LaCoO3 for direct propylene epoxidation: a DFT study
Source: Royal Society of Chemistry journal article supplement (doi:10.1039/d4cy00140k), 2024-01-01
Supplement: d4cy00140k1.pdf [file d4cy00140k1.pdf]

## *Supporting information*

### **Copper-doped LaCoO<sub>3</sub> for Direct Propylene Epoxidation: A DFT Study**

Wen-Jing Wang, Gui-Chang Wang\*

(Tianjin Key Lab and Molecule-Based Material Chemistry, College of Chemistry, Nankai University,  
Tianjin 300071, China)

#### **Contents:**

Part S1: Microkinetic modeling

Part S2: PDE over CoO, CuCoO, LaO and LaCuO surfaces

Part S3: PDE over CoO-Cl, CoCuO-Cl, LaO-Cl, and LaCuO-Cl surfaces

Part S4: The results of frequency analysis of transition states

## Part S1: Microkinetic modeling

The in-house-developed C++ program MKMCXX was employed to determine the steady-state coverages by integrating this set of ordinary differential equations with respect to time using the backward differentiation formula method. The steady-state surface coverage values were used to compute the rates of the individual elementary reaction steps. For surface reactions, the rate constant  $k$  and pre-exponential factors  $A_0$  were calculated using the following equation:

$$k = \frac{k_B T}{h} \frac{q_{iv}^{TS}}{q_{iv}^{IS}} \exp\left\{\frac{E_{ZP}}{k_B T}\right\} = A \exp\left\{\frac{-E_{ZP}}{k_B T}\right\}.$$

Where  $k_B$ ,  $E_{ZP}$ ,  $q_{iv}^{TS}$ ,  $q_{iv}^{IS}$  represent Ludwig Boltzmann's constant, activation energy corrected by zero-point energy, and vibrational partition function of TS (IS), respectively. The rate constants for adsorption and desorption of species I can be calculated as follows:

$$r'_{ads} = k_{ads} Y_i \theta_*$$

$$r'_{des} = k_{des} \theta_{i^*}$$

$k_{ads}$  ( $k_{des}$ ),  $Y_i$ ,  $\theta^*$  and  $\theta_{i^*}$  refer to the rate constants of the adsorption (desorption) process, the mole fraction and mole fraction of the gas phase, and the coverage of vacancies and I, respectively. The following equations are used to calculate  $k_{ads}$  and  $k_{des}$ :

$$k'_{ads} = \frac{A_{site} P_i \sigma_i}{\sqrt{2\pi m_i k_B T}}$$

$$k'_{des} = \frac{k_B A (2\pi m_i k_B)}{h^3 \sigma \theta_{rot}} \exp^{-E_{des}/k_B T}$$

$A_{site}$  is the area of adsorption site,  $P_i$ ,  $\sigma_i$  and  $m_i$  are the partial pressure, viscosity coefficient and mass of component  $i$  respectively.  $\sigma$  and  $\theta_{rot}$  are dimensionless symmetric numbers and characteristic

temperatures of rotation, respectively.  $E_{des}$  is desorption energy. The rotational characteristic temperature and temperature are calculated by the following formula:

$$\theta_{rot} = \frac{h^3}{8\pi^2 k_B I}$$

## Part S2: PDE over CoO, CuCoO, LaO and LaCuO surfaces

**Table S1.** Adsorption energy ( $E_{ads}$ ) and adsorption free energy ( $G_{ads}$ ) of key species involved in Propylene epoxidation on CoO, CuCoO, LaO and LaCuO surfaces.

| species                         | CoO                 |                     | CoCuO               |                     | LaO                 |                     | LaCuO               |                     |
|---------------------------------|---------------------|---------------------|---------------------|---------------------|---------------------|---------------------|---------------------|---------------------|
|                                 | $E_{ads}/\text{eV}$ | $G_{ads}/\text{eV}$ | $E_{ads}/\text{eV}$ | $G_{ads}/\text{eV}$ | $E_{ads}/\text{eV}$ | $G_{ads}/\text{eV}$ | $E_{ads}/\text{eV}$ | $G_{ads}/\text{eV}$ |
| O <sub>2</sub>                  | -0.22               | 0.28                | -0.15               | 0.35                | -0.49               | 0.02                | -0.43               | 0.07                |
| C <sub>3</sub> H <sub>6</sub>   | -0.80               | -0.16               | -0.69               | -0.05               | -0.34               | 0.30                | -0.32               | 0.32                |
| C <sub>3</sub> H <sub>5</sub>   | -0.99               | -0.35               | -0.91               | -0.27               | -0.45               | 0.19                | -0.42               | 0.22                |
| C <sub>3</sub> H <sub>5</sub> O | -2.34               | -0.99               | -2.08               | -0.79               | -2.85               | -1.81               | -2.63               | -1.06               |
| OOMMP <sub>1</sub>              | -1.17               | 0.98                | -0.96               | 1.20                | -1.22               | 0.71                | -0.80               | 1.14                |
| OOMMP <sub>2</sub>              | -1.03               | 1.11                | -0.78               | 1.40                | -0.57               | 1.25                | -0.53               | 1.33                |
| C <sub>3</sub> H <sub>4</sub> O | -1.21               | -0.55               | -0.68               | -0.02               | -0.96               | -0.30               | -0.42               | 0.25                |
| PO                              | -0.78               | -0.11               | -0.59               | 0.09                | -0.75               | -0.07               | -0.51               | 0.16                |
| PA                              | -0.71               | -0.04               | -0.89               | -0.22               | -0.83               | -0.16               | -0.44               | 0.24                |
| AC                              | -1.03               | -0.35               | -0.61               | 0.07                | -0.77               | -0.10               | -0.44               | 0.24                |

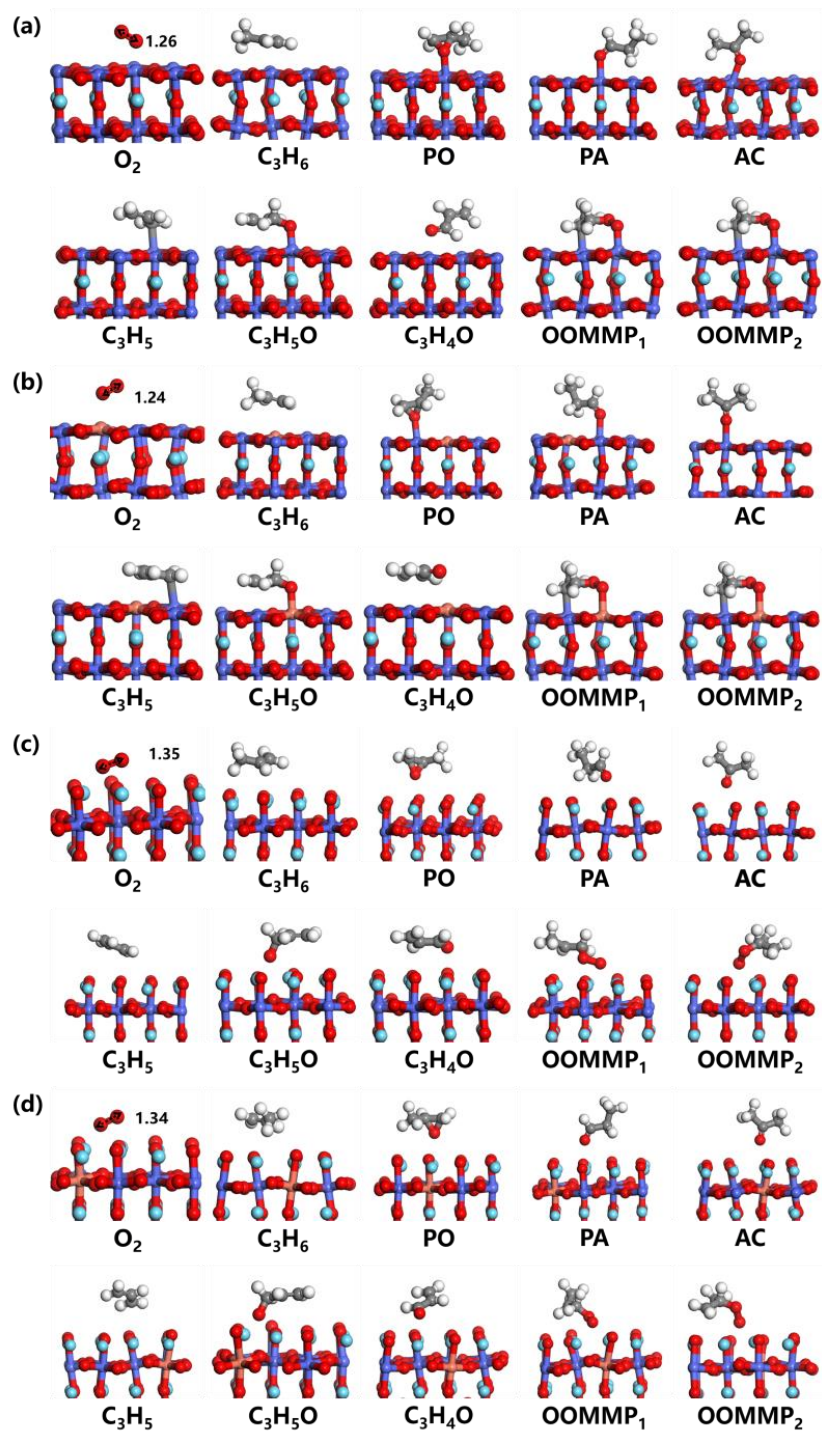

**Figure S1.** Possible adsorption configuration of key species of propylene epoxidation on CoO (a), CuCoO (b), LaO (c) and LaCuO Surface (d) (unit: Å).

**Table S2.** Elementary steps and kinetic parameters for the selective oxidation of propylene on CoO surface with molecular O<sub>2</sub>.

| Elementary reactions                                                                                             | $E_d/\text{eV}$ | $A$                   | $E_a^{-r}/\text{eV}$ | $A^{-r}$              |
|------------------------------------------------------------------------------------------------------------------|-----------------|-----------------------|----------------------|-----------------------|
| $\text{C}_3\text{H}_6^* + \text{O}_2^* \rightarrow \text{C}_3\text{H}_5^* + \text{OOH}^*$                        | 1.63            | $4.28 \times 10^{11}$ | 0.85                 | $4.56 \times 10^{12}$ |
| $\text{C}_3\text{H}_5^* + \text{OOH}^* \rightarrow \text{C}_3\text{H}_5\text{O}^* + \text{OH}$                   | 1.74            | $4.69 \times 10^{13}$ | 4.23                 | $6.82 \times 10^{13}$ |
| $\text{C}_3\text{H}_5\text{O}^* + \text{OH}^* \rightarrow \text{C}_3\text{H}_4\text{O}^* + \text{H}_2\text{O}^*$ | 1.00            | $1.08 \times 10^{13}$ | 2.79                 | $4.56 \times 10^{12}$ |
| $\text{C}_3\text{H}_6^* + \text{O}_2^* \rightarrow \text{OOMMP}_1^*$                                             | 1.75            | $1.24 \times 10^{12}$ | 0.71                 | $4.13 \times 10^{13}$ |
| $\text{OOMMP}_1^* + * \rightarrow \text{PO}_1^* + \text{O}^*$                                                    | 0.75            | $7.23 \times 10^{13}$ | 2.93                 | $8.97 \times 10^{12}$ |
| $\text{OOMMP}_1^* + * \rightarrow \text{PA}^* + \text{O}^*$                                                      | 1.35            | $2.67 \times 10^{13}$ | 3.01                 | $1.21 \times 10^{12}$ |
| $\text{C}_3\text{H}_6^* + \text{O}_2^* \rightarrow \text{OOMMP}_2^*$                                             | 1.65            | $9.07 \times 10^{11}$ | 0.71                 | $3.30 \times 10^{13}$ |
| $\text{OOMMP}_2^* + * \rightarrow \text{PO}_2^* + \text{O}^*$                                                    | 1.50            | $1.97 \times 10^{12}$ | 2.79                 | $7.63 \times 10^{12}$ |
| $\text{OOMMP}_2^* + * \rightarrow \text{AC}^* + \text{O}^*$                                                      | 1.39            | $2.90 \times 10^{12}$ | 3.64                 | $3.53 \times 10^{12}$ |
| $2\text{O}^* \rightarrow \text{O}_2^* + *$                                                                       | 1.75            | $8.64 \times 10^{12}$ | 4.34                 | $1.91 \times 10^{12}$ |

**Table S3.** Elementary steps and kinetic parameters for the selective oxidation of propylene on CoCuO surface with molecular O<sub>2</sub>.

| Elementary reactions                                                                                             | $E_d/\text{eV}$ | $A$                   | $E_a^{-r}/\text{eV}$ | $A^{-r}$              |
|------------------------------------------------------------------------------------------------------------------|-----------------|-----------------------|----------------------|-----------------------|
| $\text{C}_3\text{H}_6^* + \text{O}_2^* \rightarrow \text{C}_3\text{H}_5^* + \text{OOH}^*$                        | 2.75            | $4.17 \times 10^{12}$ | 1.15                 | $6.23 \times 10^{12}$ |
| $\text{C}_3\text{H}_5^* + \text{OOH}^* \rightarrow \text{C}_3\text{H}_5\text{O}^* + \text{OH}$                   | 1.50            | $4.57 \times 10^{12}$ | 3.53                 | $2.71 \times 10^{13}$ |
| $\text{C}_3\text{H}_5\text{O}^* + \text{OH}^* \rightarrow \text{C}_3\text{H}_4\text{O}^* + \text{H}_2\text{O}^*$ | 1.22            | $5.14 \times 10^{12}$ | 4.00                 | $2.51 \times 10^{12}$ |
| $\text{C}_3\text{H}_6^* + \text{O}_2^* \rightarrow \text{OOMMP}_1^*$                                             | 1.74            | $3.32 \times 10^{12}$ | 0.39                 | $1.02 \times 10^{14}$ |
| $\text{OOMMP}_1^* + * \rightarrow \text{PO}_1^* + \text{O}^*$                                                    | 1.71            | $2.27 \times 10^{13}$ | 1.95                 | $1.74 \times 10^{13}$ |
| $\text{OOMMP}_1^* + * \rightarrow \text{PA}^* + \text{O}^*$                                                      | 0.96            | $1.02 \times 10^{13}$ | 1.66                 | $5.04 \times 10^{13}$ |
| $\text{C}_3\text{H}_6^* + \text{O}_2^* \rightarrow \text{OOMMP}_2^*$                                             | 1.59            | $1.29 \times 10^{12}$ | 0.53                 | $2.79 \times 10^{13}$ |
| $\text{OOMMP}_2^* + * \rightarrow \text{PO}_2^* + \text{O}^*$                                                    | 1.85            | $1.84 \times 10^{13}$ | 1.84                 | $6.54 \times 10^{13}$ |
| $\text{OOMMP}_2^* + * \rightarrow \text{AC}^* + \text{O}^*$                                                      | 1.63            | $1.19 \times 10^{13}$ | 3.23                 | $4.27 \times 10^{13}$ |
| $2\text{O}^* \rightarrow \text{O}_2^* + *$                                                                       | 1.63            | $9.18 \times 10^{12}$ | 5.48                 | $3.97 \times 10^{12}$ |

**Table S4.** Elementary steps and kinetic parameters for the selective oxidation of propylene on LaO surface with molecular O<sub>2</sub>.

| Elementary reactions                                                                                             | $E_d/\text{eV}$ | $A$                                     | $E_a^{-r}/\text{eV}$ | $A^{-r}$                                |
|------------------------------------------------------------------------------------------------------------------|-----------------|-----------------------------------------|----------------------|-----------------------------------------|
| $\text{C}_3\text{H}_6^* + \text{O}_2^* \rightarrow \text{C}_3\text{H}_5^* + \text{OOH}^*$                        | 0.75            | $6.31 \times 10^{12}$                   | 0.12                 | $9.31 \times 10^{12}$                   |
| $\text{C}_3\text{H}_5^* + \text{OOH}^* \rightarrow \text{C}_3\text{H}_5\text{O}^* + \text{OH}$                   | 1.21            | $2.28 \times 10^{13}$                   | 3.58                 | $9.57 \times 10^{13}$                   |
| $\text{C}_3\text{H}_5\text{O}^* + \text{OH}^* \rightarrow \text{C}_3\text{H}_4\text{O}^* + \text{H}_2\text{O}^*$ | 0.67            | $1.38 \times 10^{13}$                   | 1.57                 | $8.01 \times 10^{12}$                   |
| $\text{C}_3\text{H}_6^* + \text{O}_2^* \rightarrow \text{OOMMP}_1^*$                                             | 0.91            | $4.20 \times 10^{12}$                   | 0.12                 | $2.05 \times 10^{13}$                   |
| $\text{OOMMP}_1^* + ^* \rightarrow \text{PO}_1^* + \text{O}^*$                                                   | 0.48            | $1.42 \times 10^{13}$                   | 1.59                 | $1.07 \times 10^{13}$                   |
| $\text{OOMMP}_1^* + ^* \rightarrow \text{PA}^* + \text{O}^*$                                                     | 0.02            | $3.93 \times 10^{13}$                   | 2.35                 | $2.27 \times 10^{13}$                   |
| $\text{C}_3\text{H}_6^* + \text{O}_2^* \rightarrow \text{OOMMP}_2^*$                                             | 1.27            | $3.50 \times 10^{12}$                   | 0.08                 | $2.12 \times 10^{13}$                   |
| $\text{OOMMP}_2^* + ^* \rightarrow \text{PO}_2^* + \text{O}^*$                                                   | 0.06            | $1.36 \times 10^{13}$                   | 1.35                 | $5.62 \times 10^{12}$                   |
| $\text{OOMMP}_2^* + ^* \rightarrow \text{AC}^* + \text{O}^*$                                                     | 0.52            | $1.61 \times 10^{13}$                   | 3.00                 | $5.69 \times 10^{12}$                   |
| $2\text{O}^* \rightarrow \text{O}_2^* + ^*$                                                                      | <b>0.36</b>     | <b><math>8.78 \times 10^{12}</math></b> | <b>1.64</b>          | <b><math>4.03 \times 10^{13}</math></b> |

**Table S5.** Elementary steps and kinetic parameters for the selective oxidation of propylene on LaCuO surface with molecular O<sub>2</sub>.

| Elementary reactions                                                                                             | $E_d/\text{eV}$ | $A$                                     | $E_a^{-r}/\text{eV}$ | $A^{-r}$                                |
|------------------------------------------------------------------------------------------------------------------|-----------------|-----------------------------------------|----------------------|-----------------------------------------|
| $\text{C}_3\text{H}_6^* + \text{O}_2^* \rightarrow \text{C}_3\text{H}_5^* + \text{OOH}^*$                        | 0.88            | $4.67 \times 10^{12}$                   | 0.51                 | $2.95 \times 10^{12}$                   |
| $\text{C}_3\text{H}_5^* + \text{OOH}^* \rightarrow \text{C}_3\text{H}_5\text{O}^* + \text{OH}$                   | 0.77            | $1.17 \times 10^{13}$                   | 2.53                 | $5.46 \times 10^{13}$                   |
| $\text{C}_3\text{H}_5\text{O}^* + \text{OH}^* \rightarrow \text{C}_3\text{H}_4\text{O}^* + \text{H}_2\text{O}^*$ | 0.17            | $2.53 \times 10^{13}$                   | 1.79                 | $6.85 \times 10^{13}$                   |
| $\text{C}_3\text{H}_6^* + \text{O}_2^* \rightarrow \text{OOMMP}_1^* + ^*$                                        | 0.78            | $6.03 \times 10^{12}$                   | 0.10                 | $2.00 \times 10^{13}$                   |
| $\text{OOMMP}_1^* + ^* \rightarrow \text{PO}_1^* + \text{O}^*$                                                   | 0.18            | $1.94 \times 10^{13}$                   | 1.63                 | $1.19 \times 10^{13}$                   |
| $\text{OOMMP}_1^* + ^* \rightarrow \text{PA}^* + \text{O}^*$                                                     | 0.01            | $2.75 \times 10^{13}$                   | 2.27                 | $1.18 \times 10^{13}$                   |
| $\text{C}_3\text{H}_6^* + \text{O}_2^* \rightarrow \text{OOMMP}_2^*$                                             | 0.96            | $4.21 \times 10^{12}$                   | 0.44                 | $1.78 \times 10^{13}$                   |
| $\text{OOMMP}_2^* + ^* \rightarrow \text{PO}_2^* + \text{O}^*$                                                   | 0.84            | $1.62 \times 10^{12}$                   | 2.22                 | $3.59 \times 10^{12}$                   |
| $\text{OOMMP}_2^* + ^* \rightarrow \text{AC}^* + \text{O}^*$                                                     | 1.25            | $6.64 \times 10^{12}$                   | 3.52                 | $7.15 \times 10^{12}$                   |
| $2\text{O}^* \rightarrow \text{O}_2^* + ^*$                                                                      | <b>0.38</b>     | <b><math>1.29 \times 10^{13}</math></b> | <b>1.61</b>          | <b><math>7.59 \times 10^{12}</math></b> |



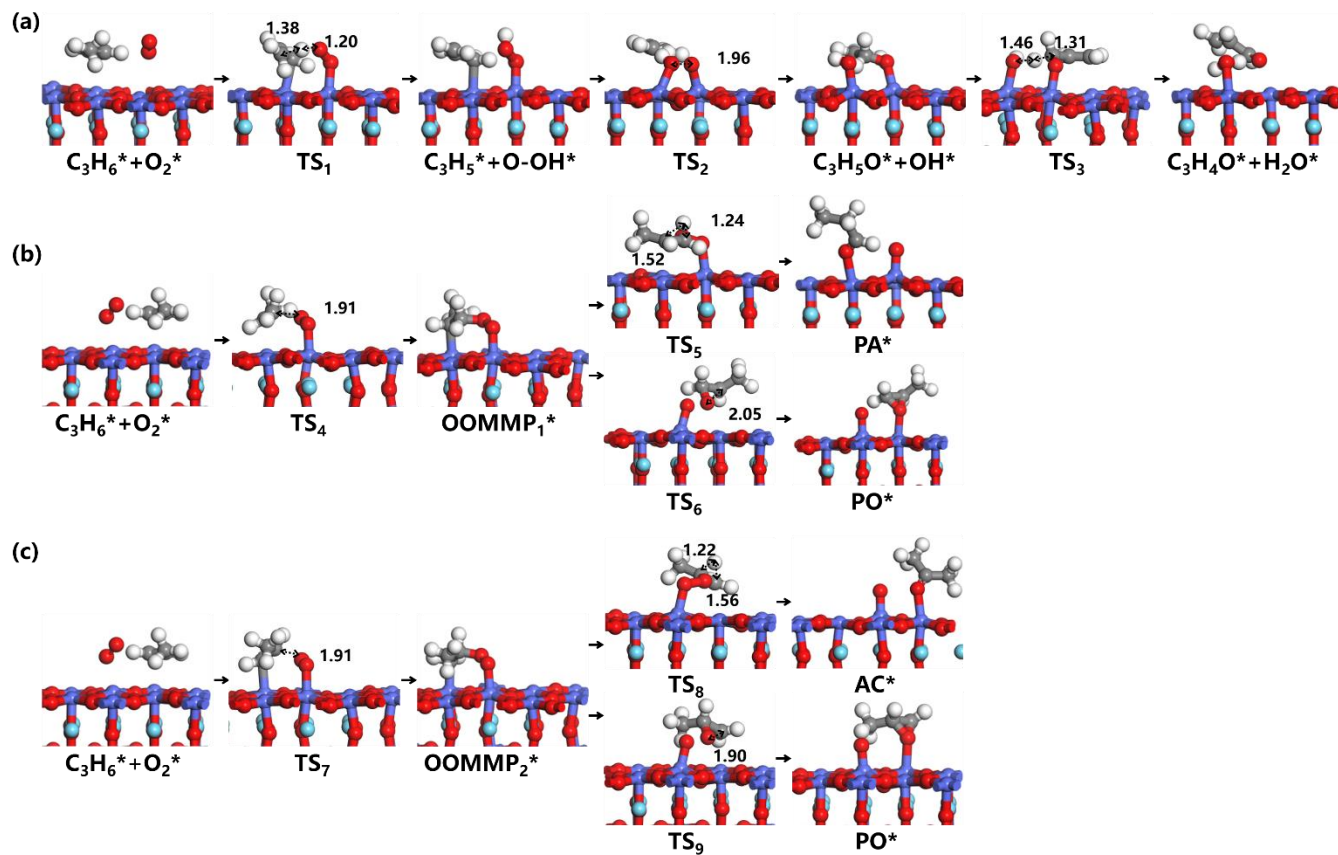

**Figure S2.** Reaction networks of dehydrogenation (a) and epoxidation (b-c) of propylene with  $O_2^*$  as an oxidant on CoO. Bond lengths are in Å.

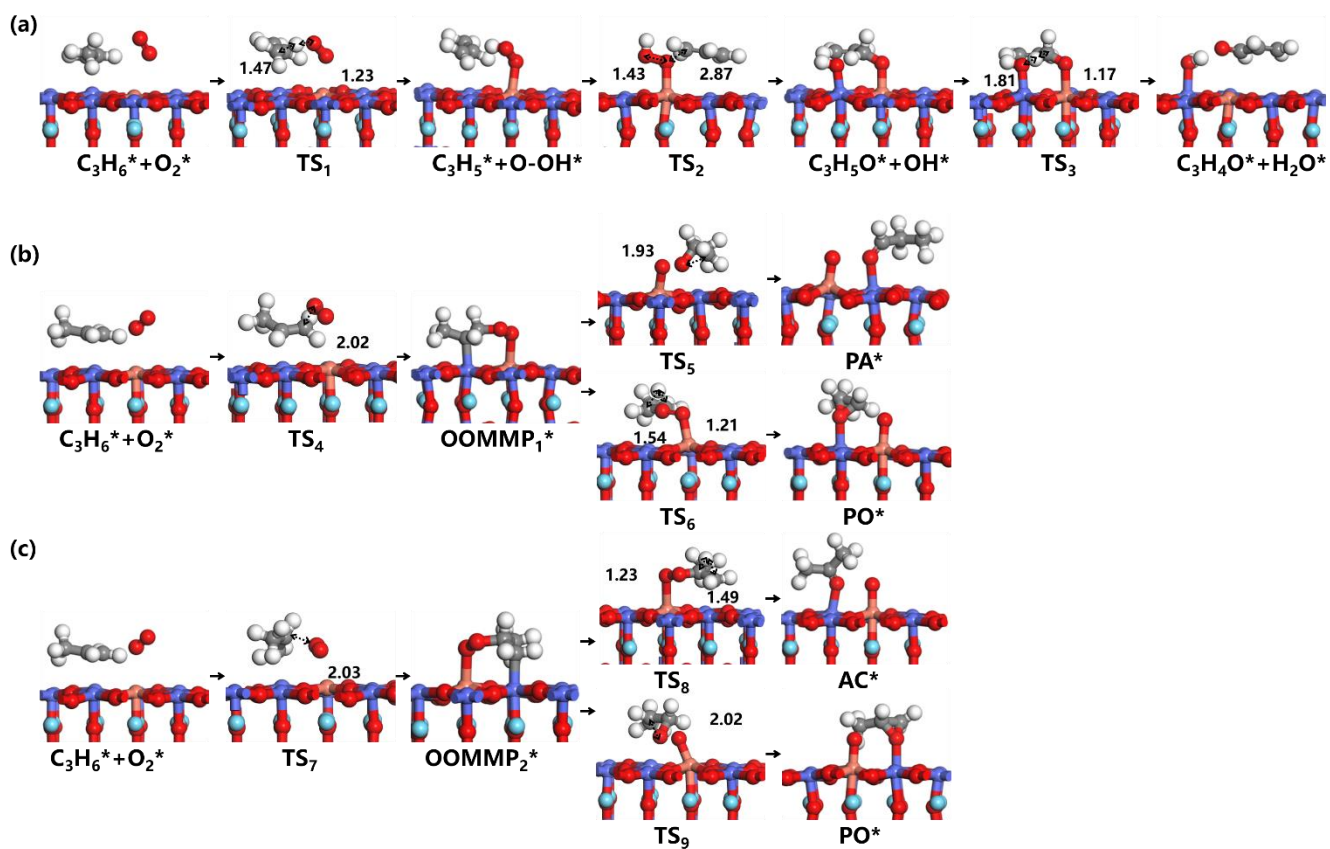

**Figure S3.** Reaction networks of dehydrogenation (a) and epoxidation (b-c) of propylene with  $O_2^*$  as an oxidant on CoCuO. Bond lengths are in Å.

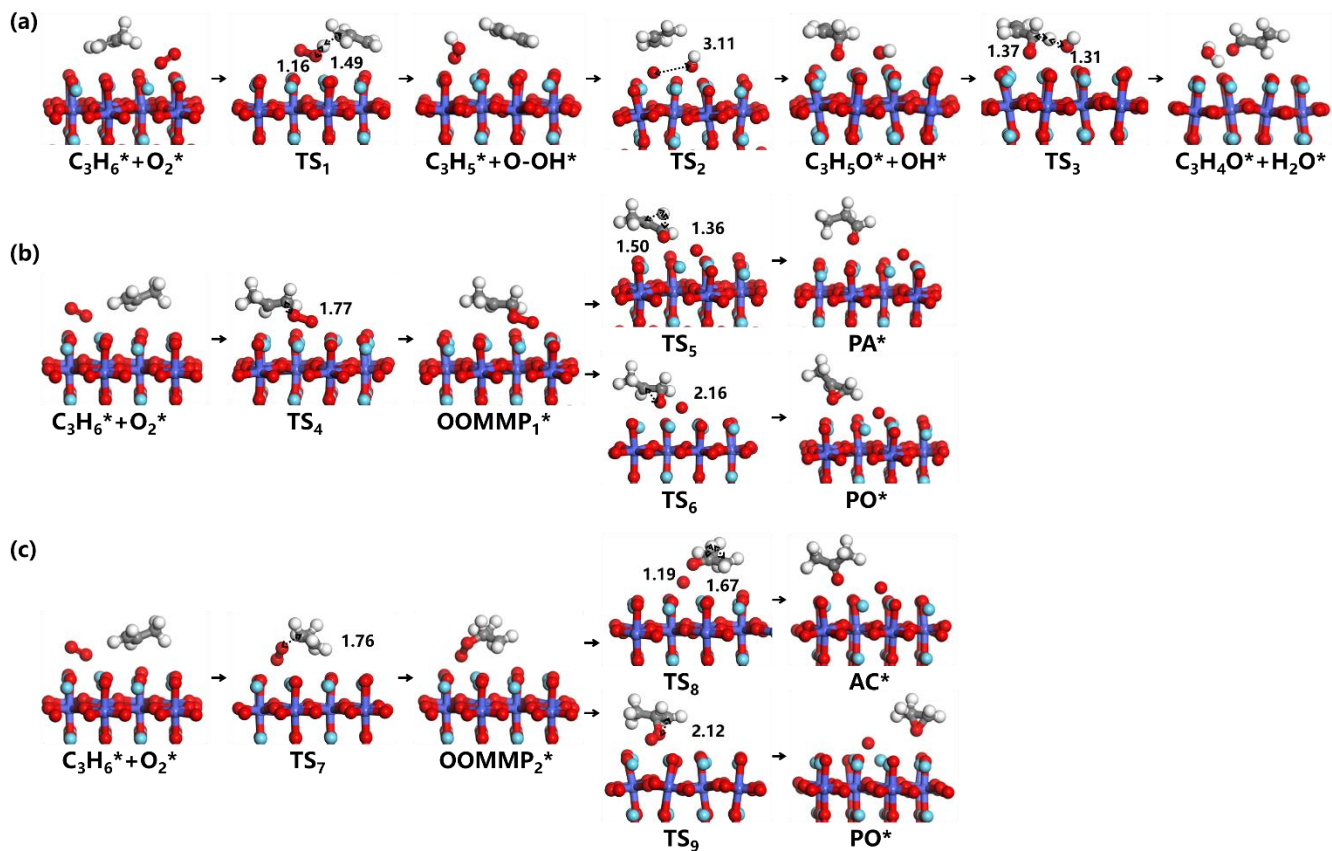

**Figure S4.** Reaction networks of dehydrogenation (a) and epoxidation (b-c) of propylene with  $O_2^*$  as an oxidant on LaO. Bond lengths are in Å.

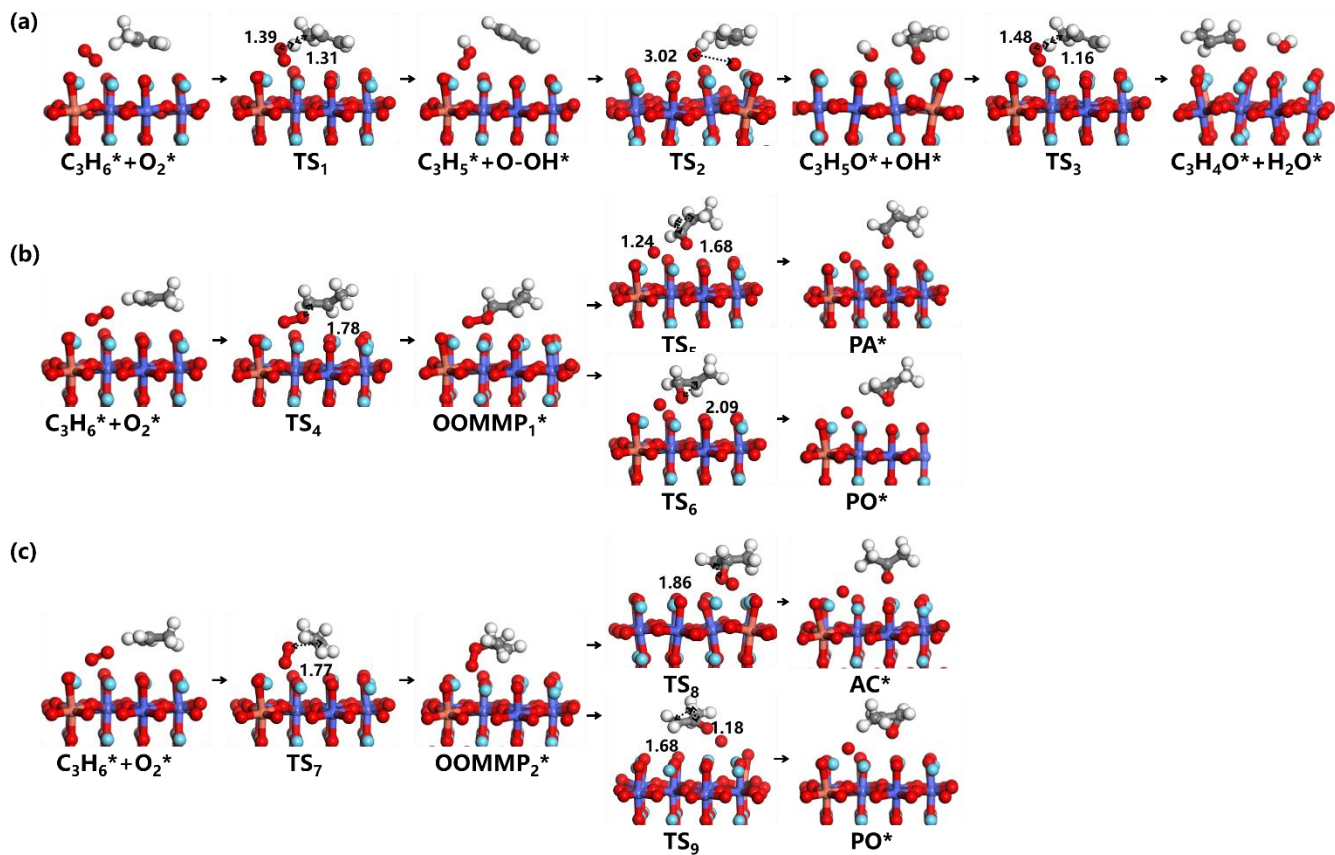

**Figure S5.** Reaction networks of dehydrogenation (a) and epoxidation (b-c) of propylene with  $O_2^*$  as an oxidant on LaCuO. Bond lengths are in Å.

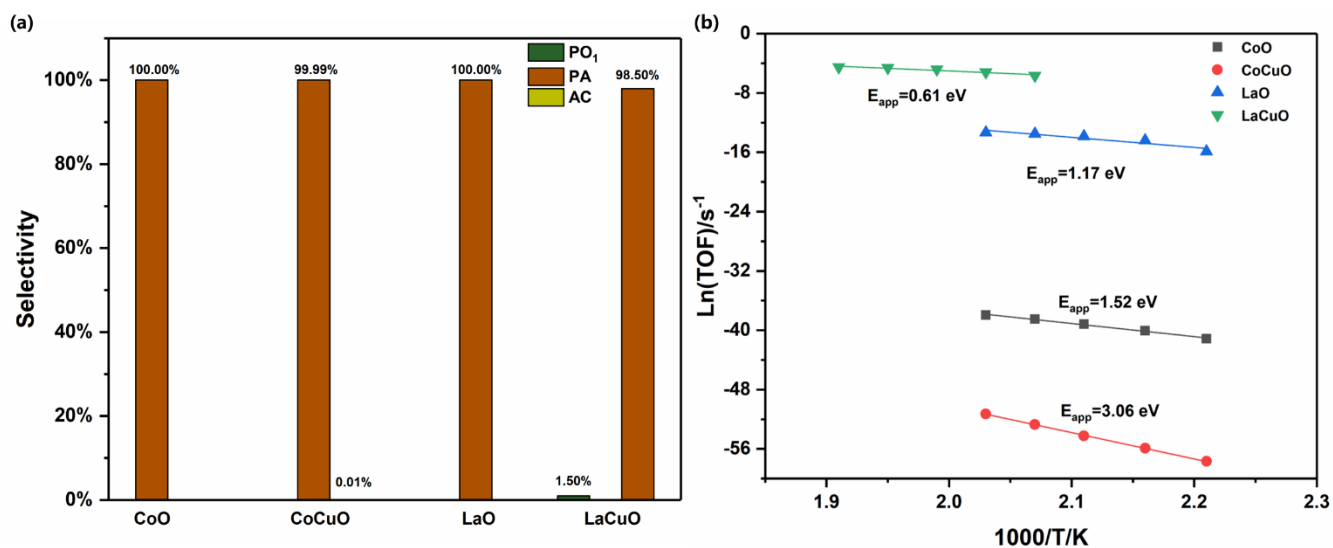

**Figure S6.** The selectivity of products at 523 K (a) and the apparent activation energies of PO (b) on CoO, CuCoO, LaO and LaCuO surfaces.

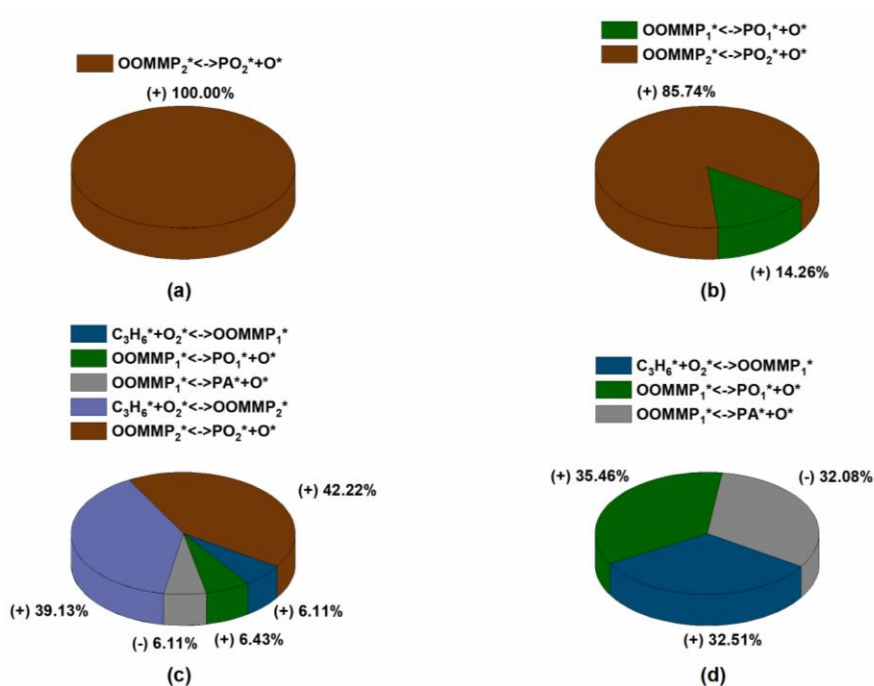

**Figure S7.** Distribution of the elementary steps toward total PO formation on CoO (a), CoCuO (b), LaO (c) and LaCuO (d). Note: Positive and negative values refer to the promotion and inhibition of the rate, respectively.

respectively.

Part S3: PDE over CoO-Cl, CoCuO-Cl, LaO-Cl, and LaCuO-Cl surfaces

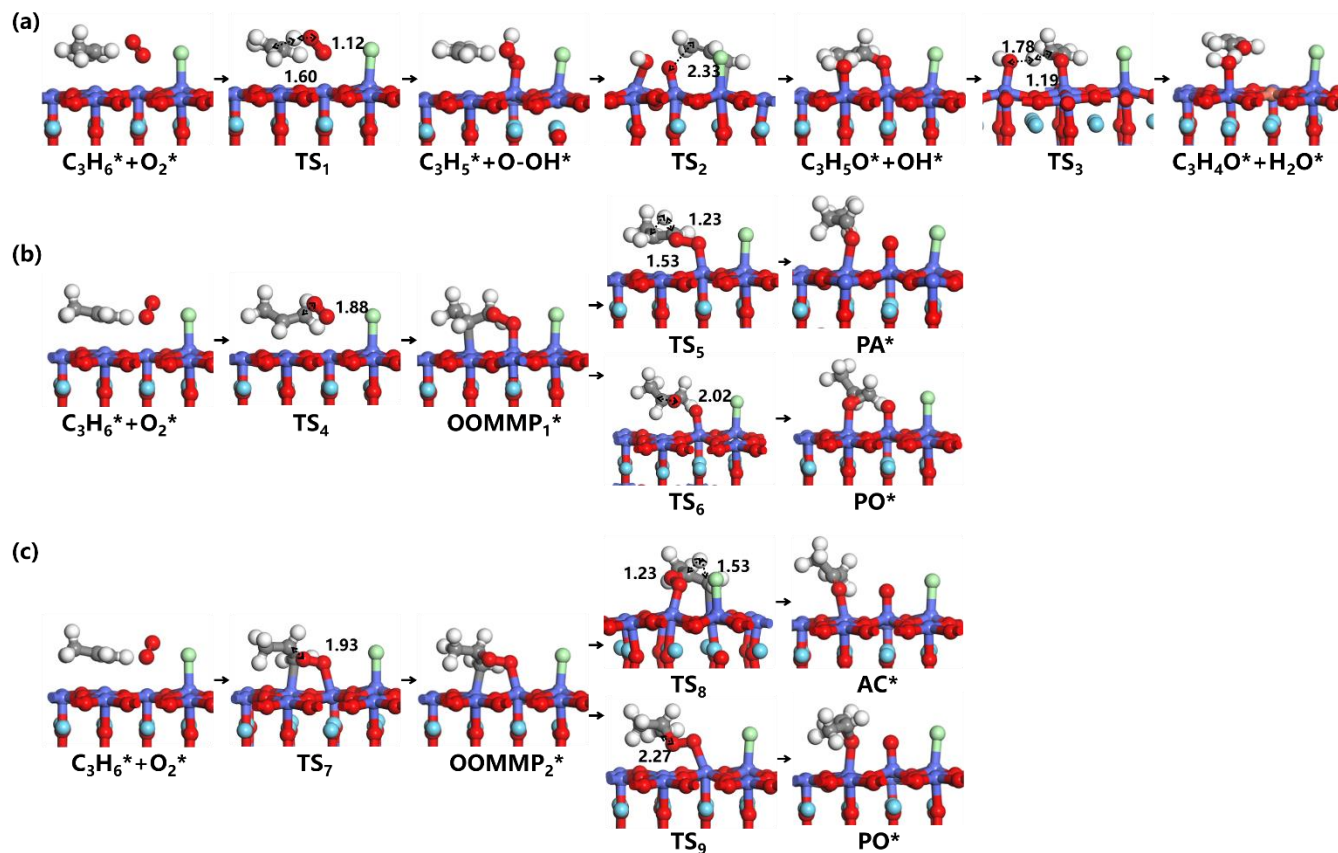

Figure S8. Reaction networks of dehydrogenation (a) and epoxidation (b-c) of propylene with  $O_2^*$

as an oxidant on CoO-Cl. Bond lengths are in  $\text{\AA}$ .

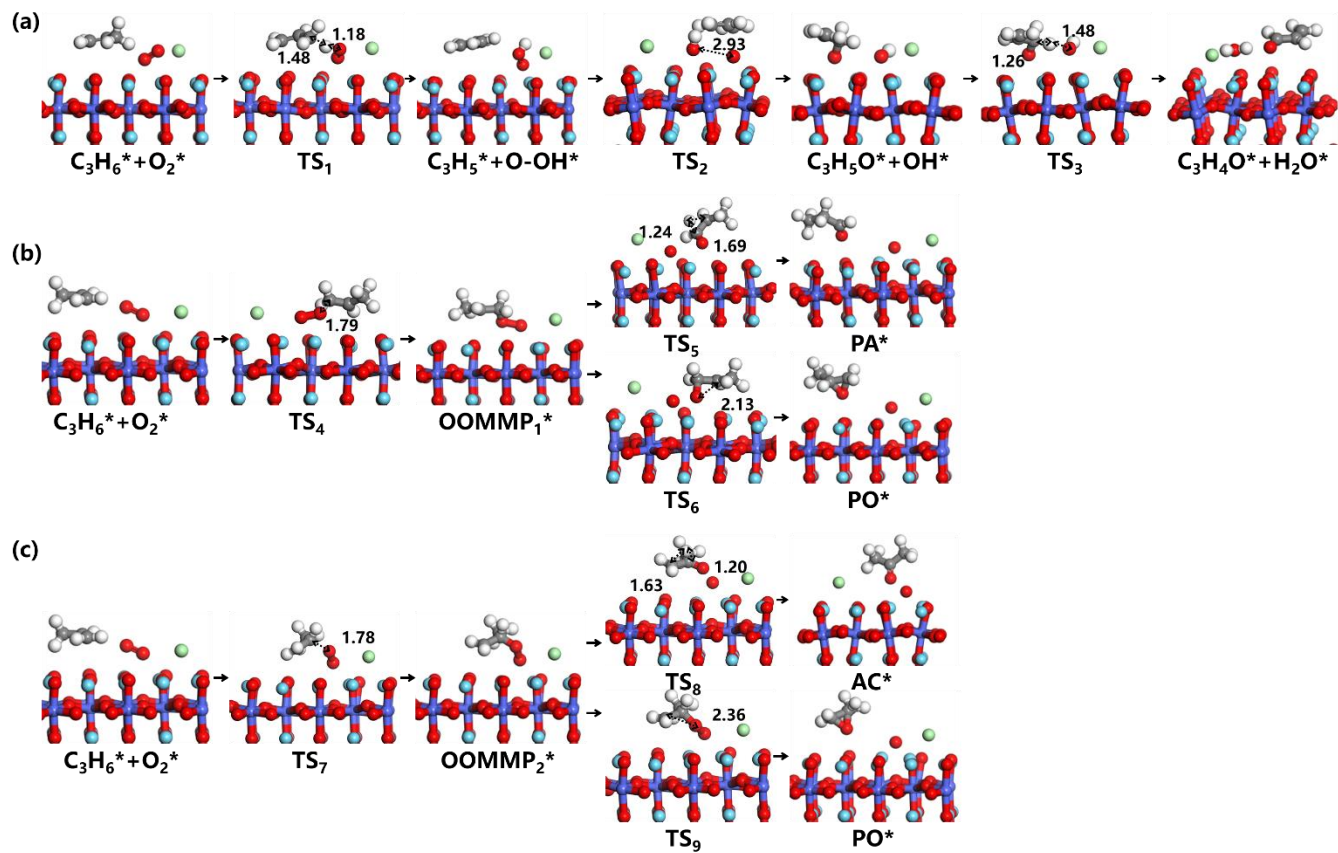

**Figure S9.** Reaction networks of dehydrogenation (a) and epoxidation (b-c) of propylene with  $O_2^*$  as an oxidant on LaO-Cl. Bond lengths are in Å.

**Table S6.**

The Gibbs free energy barriers ( $\Delta G_a$ ) and reaction free energy ( $\Delta G$ ) of each elemental step of propylene epoxidation on LaCuO-Cl terminated surfaces.

| Elementary reactions                                                  | $\Delta G/\text{eV}$ | $G_a/\text{eV}$ |
|-----------------------------------------------------------------------|----------------------|-----------------|
| $\text{C}_3\text{H}_6^* + \text{O}^* \rightarrow \text{OMMP}_1^*$     | -0.69                | 0.75            |
| $\text{OMMP}_1^* + ^*\text{O} \rightarrow \text{PA}^*$                | -1.40                | 0.50            |
| $\text{OMMP}_1^* + ^*\text{O} \rightarrow \text{PO}_1^*$              | -0.87                | 0.41            |
| $\text{C}_3\text{H}_6^* + \text{O}^* \rightarrow \text{OMMP}_2^*$     | -0.53                | 0.90            |
| $\text{OMMP}_2^* + ^*\text{O} \rightarrow \text{AC}^* + \text{O}^*$   | -2.05                | 0.23            |
| $\text{OMMP}_2^* + ^*\text{O} \rightarrow \text{PO}_2^* + \text{O}^*$ | -1.07                | 0.28            |

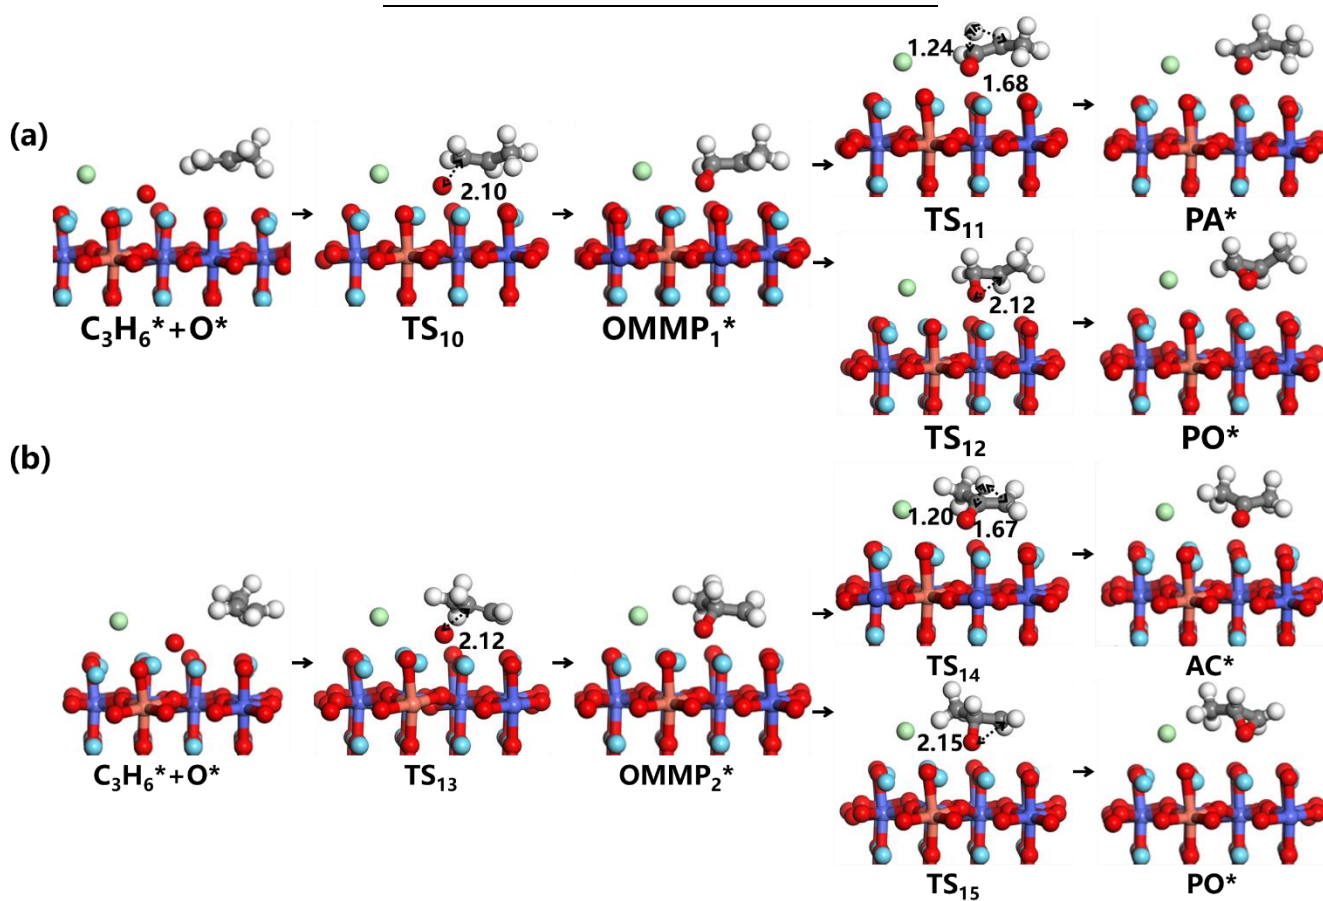**Figure S10.** Reaction networks of epoxidation (a-b) of propylene with  $\text{O}^*$  as an oxidant on LaCuO-Cl.

Bond lengths are in Å.



**Table S7.**

Adsorption energy ( $E_{ads}$ ) and adsorption free energy ( $G_{ads}$ ) of key species involved in Propylene epoxidation on CoO-Cl, CoCuO-C, LaO-Cl and LaCuO-Cl surfaces.

| species                         | CoO-Cl              |                     | CoCuO-Cl            |                     | LaO-Cl              |                     | LaCuO-Cl            |                     |
|---------------------------------|---------------------|---------------------|---------------------|---------------------|---------------------|---------------------|---------------------|---------------------|
|                                 | $E_{ads}/\text{eV}$ | $G_{ads}/\text{eV}$ | $E_{ads}/\text{eV}$ | $G_{ads}/\text{eV}$ | $E_{ads}/\text{eV}$ | $G_{ads}/\text{eV}$ | $E_{ads}/\text{eV}$ | $G_{ads}/\text{eV}$ |
| O <sub>2</sub>                  | -0.32               | 0.18                | -0.25               | 0.25                | -0.45               | 0.05                | -0.46               | 0.04                |
| C <sub>3</sub> H <sub>6</sub>   | -1.06               | -0.42               | -0.99               | -0.35               | -0.50               | 0.14                | -0.65               | -0.10               |
| C <sub>3</sub> H <sub>5</sub>   | -1.22               | -0.58               | -0.90               | -0.26               | -0.47               | 0.17                | -0.43               | 0.21                |
| C <sub>3</sub> H <sub>5</sub> O | -2.13               | -0.86               | -1.96               | -0.60               | -2.25               | -1.23               | -2.41               | -1.06               |
| OOMMP <sub>1</sub>              | -0.58               | 1.48                | -0.67               | 1.44                | -0.77               | 1.00                | -0.82               | 1.03                |
| OOMMP <sub>2</sub>              | -0.81               | 1.22                | -0.52               | 1.60                | -0.62               | 1.38                | -0.52               | 1.13                |
| C <sub>3</sub> H <sub>4</sub> O | -1.33               | -0.67               | -1.21               | -0.55               | -0.93               | -0.26               | -0.66               | 0.01                |
| PO                              | -0.60               | 0.07                | -0.91               | -0.24               | -0.84               | -0.16               | -0.67               | 0.01                |
| PA                              | -0.67               | 0.01                | -1.06               | -0.39               | -1.05               | -0.38               | -0.79               | -0.12               |
| AC                              | -0.94               | -0.26               | -1.12               | -0.44               | -1.17               | -0.49               | -0.51               | 0.17                |

**Table S8.**

Elementary steps and kinetic parameters for the selective oxidation of propylene on CoO-Cl surface

with molecular O<sub>2</sub>.

| Elementary reactions                         | $E_a/eV$ | $A$                  | $E_a^{-r}/eV$ | $A^{-r}$             |
|----------------------------------------------|----------|----------------------|---------------|----------------------|
| $C_3H_6^*+O_2^*\rightarrow C_3H_5^*+OOH^*$   | 1.58     | $1.12\times 10^{13}$ | 0.85          | $2.81\times 10^{13}$ |
| $C_3H_5^*+OOH^*\rightarrow C_3H_5O^*+OH$     | 0.56     | $5.91\times 10^{12}$ | 3.07          | $1.73\times 10^{13}$ |
| $C_3H_5O^*+OH^*\rightarrow C_3H_4O^*+H_2O^*$ | 1.26     | $6.55\times 10^{12}$ | 2.84          | $3.97\times 10^{12}$ |
| $C_3H_6^*+O_2^*\rightarrow OOMMP_1^*$        | 0.89     | $2.46\times 10^{12}$ | 0.49          | $4.77\times 10^{13}$ |
| $OOMMP_1^*+^*\rightarrow PO_1^*+O^*$         | 1.16     | $3.79\times 10^{13}$ | 1.94          | $4.84\times 10^{13}$ |
| $OOMMP_1^*+^*\rightarrow PA^*+O^*$           | 0.54     | $2.75\times 10^{13}$ | 1.74          | $9.81\times 10^{12}$ |
| $C_3H_6^*+O_2^*\rightarrow OOMMP_2^*$        | 0.71     | $1.90\times 10^{12}$ | 0.68          | $2.28\times 10^{13}$ |
| $OOMMP_2^*+^*\rightarrow PO_2^*+O^*$         | 0.99     | $7.67\times 10^{12}$ | 1.29          | $8.13\times 10^{12}$ |
| $OOMMP_2^*+^*\rightarrow AC^*+O^*$           | 1.24     | $7.13\times 10^{12}$ | 2.66          | $6.36\times 10^{12}$ |
| $2O^*\rightarrow O_2^*+^*$                   | 1.24     | $1.61\times 10^{13}$ | 3.79          | $9.27\times 10^{12}$ |

**Table S9.**

Elementary steps and kinetic parameters for the selective oxidation of propylene on CoCuO-Cl surface with molecular O<sub>2</sub>.

| Elementary reactions                              | $E_a/eV$    | $A$                                     | $E_a^{-r}/eV$ | $A^{-r}$                                |
|---------------------------------------------------|-------------|-----------------------------------------|---------------|-----------------------------------------|
| $C_3H_6^* + O_2^* \rightarrow C_3H_5^* + OOH^*$   | 2.04        | $2.92 \times 10^{12}$                   | 1.34          | $4.81 \times 10^{12}$                   |
| $C_3H_5^* + OOH^* \rightarrow C_3H_5O^* + OH$     | 1.27        | $3.53 \times 10^{12}$                   | 3.19          | $4.32 \times 10^{13}$                   |
| $C_3H_5O^* + OH^* \rightarrow C_3H_4O^* + H_2O^*$ | 0.77        | $1.60 \times 10^{13}$                   | 3.69          | $4.48 \times 10^{12}$                   |
| $C_3H_6^* + O_2^* \rightarrow OOMMP_1^*$          | 1.33        | $2.68 \times 10^{12}$                   | 0.22          | $3.25 \times 10^{13}$                   |
| $OOMMP_1^* + ^* \rightarrow PO_1^* + O^*$         | 0.69        | $4.05 \times 10^{13}$                   | 1.70          | $2.41 \times 10^{12}$                   |
| $OOMMP_1^* + ^* \rightarrow PA^* + O^*$           | 0.67        | $3.25 \times 10^{13}$                   | 2.58          | $7.39 \times 10^{12}$                   |
| $C_3H_6^* + O_2^* \rightarrow OOMMP_2^*$          | 1.60        | $2.50 \times 10^{12}$                   | 0.40          | $4.48 \times 10^{13}$                   |
| $OOMMP_2^* + ^* \rightarrow PO_2^* + O^*$         | 1.70        | $6.76 \times 10^{12}$                   | 2.78          | $3.12 \times 10^{13}$                   |
| $OOMMP_2^* + ^* \rightarrow AC^* + O^*$           | 0.54        | $1.53 \times 10^{13}$                   | 2.55          | $2.89 \times 10^{12}$                   |
| $2O^* \rightarrow O_2^* + ^*$                     | <b>0.36</b> | <b><math>5.30 \times 10^{12}</math></b> | <b>1.64</b>   | <b><math>2.56 \times 10^{12}</math></b> |

**Table S10.**

Elementary steps and kinetic parameters for the selective oxidation of propylene on LaO-Cl surface with molecular O<sub>2</sub>.

| Elementary reactions                              | $E_a/eV$ | $A$                   | $E_a^{-r}/eV$ | $A^{-r}$              |
|---------------------------------------------------|----------|-----------------------|---------------|-----------------------|
| $C_3H_6^* + O_2^* \rightarrow C_3H_5^* + OOH^*$   | 0.82     | $5.07 \times 10^{12}$ | 0.12          | $1.20 \times 10^{13}$ |
| $C_3H_5^* + OOH^* \rightarrow C_3H_5O^* + OH$     | 0.34     | $4.45 \times 10^{13}$ | 3.47          | $1.18 \times 10^{14}$ |
| $C_3H_5O^* + OH^* \rightarrow C_3H_4O^* + H_2O^*$ | 0.63     | $1.44 \times 10^{13}$ | 2.14          | $9.12 \times 10^{12}$ |
| $C_3H_6^* + O_2^* \rightarrow OOMMP_1^* + ^*$     | 0.74     | $6.21 \times 10^{12}$ | 0.46          | $2.36 \times 10^{13}$ |
| $OOMMP_1^* + ^* \rightarrow PO_1^* + O^*$         | 0.64     | $1.05 \times 10^{13}$ | 2.06          | $7.30 \times 10^{12}$ |
| $OOMMP_1^* + ^* \rightarrow PA^* + O^*$           | 0.60     | $2.02 \times 10^{13}$ | 2.26          | $3.40 \times 10^{13}$ |
| $C_3H_6^* + O_2^* \rightarrow OOMMP_2^*$          | 0.77     | $5.87 \times 10^{12}$ | 0.09          | $4.38 \times 10^{13}$ |
| $OOMMP_2^* + ^* \rightarrow PO_2^* + O^*$         | 0.25     | $2.55 \times 10^{13}$ | 2.02          | $2.40 \times 10^{12}$ |
| $OOMMP_2^* + ^* \rightarrow AC^* + O^*$           | 0.74     | $1.36 \times 10^{13}$ | 3.03          | $6.39 \times 10^{12}$ |
| $2O^* \rightarrow O_2^* + ^*$                     | 0.02     | $1.10 \times 10^{13}$ | 1.35          | $7.50 \times 10^{12}$ |

**Table S11.**

Elementary steps and kinetic parameters for the selective oxidation of propylene on LaCuO-Cl surface with molecular O<sub>2</sub>.

| Elementary reactions                         | $E_a/eV$ | $A$                  | $E_a^{-r}/eV$ | $A^{-r}$             |
|----------------------------------------------|----------|----------------------|---------------|----------------------|
| $C_3H_6^*+O_2^*\rightarrow C_3H_5^*+OOH^*$   | 1.09     | $4.46\times 10^{12}$ | 0.38          | $3.21\times 10^{12}$ |
| $C_3H_5^*+OOH^*\rightarrow C_3H_5O^*+OH$     | 0.87     | $1.14\times 10^{13}$ | 3.32          | $5.78\times 10^{13}$ |
| $C_3H_5O^*+OH^*\rightarrow C_3H_4O^*+H_2O^*$ | 1.27     | $2.94\times 10^{13}$ | 3.35          | $7.67\times 10^{12}$ |
| $C_3H_6^*+O_2^*\rightarrow OOMMP_1^*$        | 0.97     | $9.92\times 10^{12}$ | 0.44          | $1.75\times 10^{13}$ |
| $OOMMP_1^*+^*\rightarrow PO_1^*+O^*$         | 0.26     | $8.40\times 10^{12}$ | 1.55          | $1.05\times 10^{13}$ |
| $OOMMP_1^*+^*\rightarrow PA^*+O^*$           | 0.37     | $1.65\times 10^{13}$ | 2.38          | $1.59\times 10^{13}$ |
| $C_3H_6^*+O_2^*\rightarrow OOMMP_2^*$        | 0.77     | $4.51\times 10^{12}$ | 0.12          | $1.34\times 10^{13}$ |
| $OOMMP_2^*+^*\rightarrow PO_2^*+O^*$         | 0.47     | $1.22\times 10^{13}$ | 2.06          | $4.47\times 10^{12}$ |
| $OOMMP_2^*+^*\rightarrow AC^*+O^*$           | 0.96     | $1.27\times 10^{13}$ | 3.52          | $3.30\times 10^{12}$ |
| $C_3H_6^*+O^*\rightarrow OMMP_1^*$           | 0.75     | $6.65\times 10^{12}$ | 1.36          | $8.93\times 10^{12}$ |
| $OMMP_1^*+^*\rightarrow PO_1^*$              | 0.41     | $1.05\times 10^{13}$ | 1.75          | $1.50\times 10^{13}$ |
| $OMMP_1^*+^*\rightarrow PA^*$                | 0.46     | $4.02\times 10^{12}$ | 1.84          | $9.22\times 10^{12}$ |
| $C_3H_6^*+O^*\rightarrow OMMP_2^*$           | 0.92     | $1.09\times 10^{13}$ | 1.34          | $5.51\times 10^{13}$ |
| $OMMP_2^*+^*\rightarrow PO_2^*$              | 0.20     | $4.84\times 10^{13}$ | 1.34          | $1.04\times 10^{13}$ |
| $OMMP_2^*+^*\rightarrow AC^*$                | 0.12     | $3.92\times 10^{13}$ | 2.21          | $7.71\times 10^{12}$ |
| $2O^*\rightarrow O_2^*+^*$                   | 0.64     | $1.10\times 10^{13}$ | 1.14          | $4.07\times 10^{12}$ |

## Part S4: The results of frequency analysis of transition states

**Table S12.**

The results of frequency analysis of transition states on CoO surface

| TS <sub>1</sub> |        | TS <sub>2</sub> |        | TS <sub>3</sub> |        | TS <sub>4</sub> |        | TS <sub>7</sub> |        | TS <sub>5</sub> |        | TS <sub>6</sub> |        | TS <sub>8</sub> |        | TS <sub>9</sub> |        |
|-----------------|--------|-----------------|--------|-----------------|--------|-----------------|--------|-----------------|--------|-----------------|--------|-----------------|--------|-----------------|--------|-----------------|--------|
| 1f              | 3172.2 | 1f              | 3700.9 | 1f              | 3638.8 | 1f              | 3142.2 | 1f              | 3158.3 | 1f              | 3100.7 | 1f              | 3099.8 | 1f              | 3099.8 | 1f              | 3197.6 |
| 2f              | 3122.6 | 2f              | 3189.8 | 2f              | 3162.3 | 2f              | 3085.0 | 2f              | 3074.7 | 2f              | 3087.3 | 2f              | 3059.1 | 2f              | 3059.1 | 2f              | 3081.2 |
| 3f              | 3070.4 | 3f              | 3153.2 | 3f              | 3081.2 | 3f              | 3045.4 | 3f              | 3056.4 | 3f              | 3066.5 | 3f              | 3005.6 | 3f              | 3005.6 | 3f              | 3060.4 |
| 4f              | 3051.1 | 4f              | 3088.6 | 4f              | 3064.8 | 4f              | 3026.6 | 4f              | 3044.6 | 4f              | 3020.4 | 4f              | 2981.8 | 4f              | 2981.8 | 4f              | 3033.3 |
| 5f              | 3015.9 | 5f              | 3082.9 | 5f              | 2837.0 | 5f              | 3012.1 | 5f              | 3036.1 | 5f              | 2951.0 | 5f              | 2931.3 | 5f              | 2931.3 | 5f              | 2979.8 |
| 6f              | 1505.0 | 6f              | 3008.7 | 6f              | 1575.9 | 6f              | 2938.7 | 6f              | 2976.9 | 6f              | 2187.6 | 6f              | 2893.3 | 6f              | 2893.3 | 6f              | 2956.1 |
| 7f              | 1454.7 | 7f              | 1505.7 | 7f              | 1393.5 | 7f              | 1451.6 | 7f              | 1445.2 | 7f              | 1449.8 | 7f              | 1458.2 | 7f              | 1458.2 | 7f              | 1448.6 |
| 8f              | 1398.0 | 8f              | 1473.7 | 8f              | 1378.1 | 8f              | 1435.9 | 8f              | 1430.4 | 8f              | 1410.6 | 8f              | 1436.6 | 8f              | 1436.6 | 8f              | 1429.0 |
| 9f              | 1370.2 | 9f              | 1392.5 | 9f              | 1295.8 | 9f              | 1405.3 | 9f              | 1413.3 | 9f              | 1378.2 | 9f              | 1408.6 | 9f              | 1408.6 | 9f              | 1383.0 |
| 10f             | 1257.1 | 10f             | 1260.4 | 10f             | 1265.0 | 10f             | 1365.2 | 10f             | 1373.0 | 10f             | 1349.5 | 10f             | 1369.2 | 10f             | 1369.2 | 10f             | 1352.0 |
| 11f             | 1221.8 | 11f             | 1213.0 | 11f             | 1254.7 | 11f             | 1336.5 | 11f             | 1331.6 | 11f             | 1328.7 | 11f             | 1331.4 | 11f             | 1331.4 | 11f             | 1321.9 |
| 12f             | 1185.2 | 12f             | 1019.1 | 12f             | 1224.7 | 12f             | 1201.3 | 12f             | 1204.7 | 12f             | 1234.8 | 12f             | 1253.4 | 12f             | 1253.4 | 12f             | 1220.6 |
| 13f             | 1033.6 | 13f             | 986.0  | 13f             | 1033.5 | 13f             | 1162.5 | 13f             | 1172.5 | 13f             | 1155.5 | 13f             | 1164.6 | 13f             | 1164.6 | 13f             | 1149.5 |
| 14f             | 996.0  | 14f             | 926.1  | 14f             | 998.1  | 14f             | 1127.3 | 14f             | 1147.5 | 14f             | 1146.3 | 14f             | 1158.2 | 14f             | 1158.2 | 14f             | 1120.5 |
| 15f             | 988.1  | 15f             | 885.6  | 15f             | 920.0  | 15f             | 1020.9 | 15f             | 1012.4 | 15f             | 1033.7 | 15f             | 1119.3 | 15f             | 1119.3 | 15f             | 1053.0 |
| 16f             | 938.9  | 16f             | 850.8  | 16f             | 912.6  | 16f             | 977.3  | 16f             | 944.0  | 16f             | 1007.5 | 16f             | 1032.2 | 16f             | 1032.2 | 16f             | 911.9  |
| 17f             | 887.6  | 17f             | 737.0  | 17f             | 858.8  | 17f             | 947.4  | 17f             | 928.6  | 17f             | 945.9  | 17f             | 942.0  | 17f             | 942.0  | 17f             | 885.3  |
| 18f             | 867.7  | 18f             | 572.8  | 18f             | 801.7  | 18f             | 901.1  | 18f             | 907.0  | 18f             | 885.8  | 18f             | 912.3  | 18f             | 912.3  | 18f             | 844.8  |
| 19f             | 684.8  | 19f             | 523.8  | 19f             | 677.5  | 19f             | 821.7  | 19f             | 838.4  | 19f             | 833.7  | 19f             | 870.6  | 19f             | 870.6  | 19f             | 792.2  |
| 20f             | 635.9  | 20f             | 497.2  | 20f             | 576.7  | 20f             | 730.8  | 20f             | 647.6  | 20f             | 708.6  | 20f             | 669.5  | 20f             | 669.5  | 20f             | 641.7  |
| 21f             | 509.8  | 21f             | 431.2  | 21f             | 553.8  | 21f             | 441.9  | 21f             | 483.1  | 21f             | 600.7  | 21f             | 490.7  | 21f             | 490.7  | 21f             | 523.6  |
| 22f             | 416.8  | 22f             | 426.7  | 22f             | 457.7  | 22f             | 373.7  | 22f             | 419.0  | 22f             | 442.7  | 22f             | 394.0  | 22f             | 394.0  | 22f             | 461.4  |
| 23f             | 343.3  | 23f             | 335.8  | 23f             | 363.4  | 23f             | 336.5  | 23f             | 389.2  | 23f             | 402.3  | 23f             | 340.2  | 23f             | 340.2  | 23f             | 393.7  |
| 24f             | 288.1  | 24f             | 207.2  | 24f             | 345.0  | 24f             | 316.5  | 24f             | 305.1  | 24f             | 350.4  | 24f             | 245.3  | 24f             | 245.3  | 24f             | 369.8  |
| 25f             | 243.6  | 25f             | 181.1  | 25f             | 311.2  | 25f             | 188.6  | 25f             | 255.2  | 25f             | 200.5  | 25f             | 202.1  | 25f             | 202.1  | 25f             | 247.6  |
| 26f             | 207.0  | 26f             | 158.7  | 26f             | 242.7  | 26f             | 158.8  | 26f             | 211.9  | 26f             | 184.1  | 26f             | 148.4  | 26f             | 148.4  | 26f             | 230.2  |
| 27f             | 172.7  | 27f             | 114.2  | 27f             | 150.7  | 27f             | 125.4  | 27f             | 176.1  | 27f             | 168.8  | 27f             | 103.2  | 27f             | 103.2  | 27f             | 203.4  |
| 28f             | 140.9  | 28f             | 88.8   | 28f             | 129.7  | 28f             | 115.8  | 28f             | 103.3  | 28f             | 126.6  | 28f             | 86.0   | 28f             | 86.0   | 28f             | 167.4  |
| 29f             | 113.7  | 29f             | 51.0   | 29f             | 121.4  | 29f             | 102.3  | 29f             | 89.8   | 29f             | 106.0  | 29f             | 70.3   | 29f             | 70.3   | 29f             | 98.0   |
| 30f             | 80.9   | 30f             | 24.7   | 30f             | 106.7  | 30f             | 66.4   | 30f             | 62.0   | 30f             | 94.1   | 30f             | 38.7   | 30f             | 38.7   | 30f             | 89.3   |
| 31f             | 63.0   | 31f/i           | 22.6   | 31f             | 77.3   | 31f             | 53.7   | 31f             | 54.3   | 31f             | 75.7   | 31f             | 25.5   | 31f             | 25.5   | 31f             | 59.8   |
| 32f             | 53.1   | 32f/i           | 40.4   | 32f             | 61.9   | 32f/i           | 14.7   | 32f             | 16.3   | 32f             | 24.8   | 32f/i           | 36.6   | 32f/i           | 36.6   | 32f             | 44.4   |
| 33f/i           | 1327.6 | 33f/i           | 466.5  | 33f/i           | 1251.7 | 33f/i           | 462.9  | 33f/i           | 352.0  | 33f/i           | 1017.1 | 33f/i           | 561.4  | 33f/i           | 561.4  | 33f/i           | 649.3  |

**Table S13.**

The results of frequency analysis of transition states on CoCuO surface

| TS <sub>1</sub> |        | TS <sub>2</sub> |        | TS <sub>3</sub> |        | TS <sub>4</sub> |        | TS <sub>7</sub> |        | TS <sub>5</sub> |        | TS <sub>6</sub> |        | TS <sub>8</sub> |        | TS <sub>9</sub> |        |
|-----------------|--------|-----------------|--------|-----------------|--------|-----------------|--------|-----------------|--------|-----------------|--------|-----------------|--------|-----------------|--------|-----------------|--------|
| 1f              | 3091.1 | 1f              | 3124.1 | 1f              | 3193.7 | 1f              | 3197.8 | 1f              | 3151.7 | 1f              | 3091.1 | 1f              | 3124.1 | 1f              | 3193.7 | 1f              | 3197.8 |
| 2f              | 3073.7 | 2f              | 3079.1 | 2f              | 3074.6 | 2f              | 3077.9 | 2f              | 3075.3 | 2f              | 3073.7 | 2f              | 3079.1 | 2f              | 3074.6 | 2f              | 3077.9 |
| 3f              | 3062.9 | 3f              | 3026.7 | 3f              | 3072.6 | 3f              | 3075.1 | 3f              | 3056.6 | 3f              | 3062.9 | 3f              | 3026.7 | 3f              | 3072.6 | 3f              | 3075.1 |
| 4f              | 3004.6 | 4f              | 3002.2 | 4f              | 3044.8 | 4f              | 3061.3 | 4f              | 3038.0 | 4f              | 3004.6 | 4f              | 3002.2 | 4f              | 3044.8 | 4f              | 3061.3 |
| 5f              | 2948.6 | 5f              | 2948.2 | 5f              | 2973.0 | 5f              | 2978.8 | 5f              | 3031.5 | 5f              | 2948.6 | 5f              | 2948.2 | 5f              | 2973.0 | 5f              | 2978.8 |
| 6f              | 2202.0 | 6f              | 2901.8 | 6f              | 2163.4 | 6f              | 2957.3 | 6f              | 2966.7 | 6f              | 2202.0 | 6f              | 2901.8 | 6f              | 2163.4 | 6f              | 2957.3 |
| 7f              | 1454.2 | 7f              | 1456.8 | 7f              | 1433.1 | 7f              | 1447.7 | 7f              | 1449.8 | 7f              | 1454.2 | 7f              | 1456.8 | 7f              | 1433.1 | 7f              | 1447.7 |
| 8f              | 1404.0 | 8f              | 1429.9 | 8f              | 1398.4 | 8f              | 1429.5 | 8f              | 1434.6 | 8f              | 1404.0 | 8f              | 1429.9 | 8f              | 1398.4 | 8f              | 1429.5 |
| 9f              | 1399.5 | 9f              | 1394.8 | 9f              | 1380.6 | 9f              | 1405.4 | 9f              | 1410.7 | 9f              | 1399.5 | 9f              | 1394.8 | 9f              | 1380.6 | 9f              | 1405.4 |
| 10f             | 1338.6 | 10f             | 1356.8 | 10f             | 1363.5 | 10f             | 1363.6 | 10f             | 1369.3 | 10f             | 1338.6 | 10f             | 1356.8 | 10f             | 1363.5 | 10f             | 1363.6 |
| 11f             | 1241.5 | 11f             | 1320.1 | 11f             | 1289.2 | 11f             | 1335.5 | 11f             | 1337.5 | 11f             | 1241.5 | 11f             | 1320.1 | 11f             | 1289.2 | 11f             | 1335.5 |
| 12f             | 1190.0 | 12f             | 1247.9 | 12f             | 1253.7 | 12f             | 1236.3 | 12f             | 1284.1 | 12f             | 1190.0 | 12f             | 1247.9 | 12f             | 1253.7 | 12f             | 1236.3 |
| 13f             | 1181.3 | 13f             | 1183.6 | 13f             | 1120.9 | 13f             | 1156.7 | 13f             | 1186.5 | 13f             | 1181.3 | 13f             | 1183.6 | 13f             | 1120.9 | 13f             | 1156.7 |
| 14f             | 1148.8 | 14f             | 1154.3 | 14f             | 1042.4 | 14f             | 1122.4 | 14f             | 1142.5 | 14f             | 1148.8 | 14f             | 1154.3 | 14f             | 1042.4 | 14f             | 1122.4 |
| 15f             | 1106.4 | 15f             | 1120.5 | 15f             | 992.9  | 15f             | 1039.3 | 15f             | 993.7  | 15f             | 1106.4 | 15f             | 1120.5 | 15f             | 992.9  | 15f             | 1039.3 |
| 16f             | 1008.0 | 16f             | 1031.5 | 16f             | 962.2  | 16f             | 912.0  | 16f             | 934.1  | 16f             | 1008.0 | 16f             | 1031.5 | 16f             | 962.2  | 16f             | 912.0  |
| 17f             | 955.1  | 17f             | 938.8  | 17f             | 896.6  | 17f             | 866.4  | 17f             | 908.5  | 17f             | 955.1  | 17f             | 938.8  | 17f             | 896.6  | 17f             | 866.4  |
| 18f             | 892.1  | 18f             | 903.5  | 18f             | 841.5  | 18f             | 833.8  | 18f             | 889.8  | 18f             | 892.1  | 18f             | 903.5  | 18f             | 841.5  | 18f             | 833.8  |
| 19f             | 804.6  | 19f             | 875.8  | 19f             | 806.2  | 19f             | 799.7  | 19f             | 768.7  | 19f             | 804.6  | 19f             | 875.8  | 19f             | 806.2  | 19f             | 799.7  |
| 20f             | 775.0  | 20f             | 688.8  | 20f             | 631.9  | 20f             | 582.0  | 20f             | 602.7  | 20f             | 775.0  | 20f             | 688.8  | 20f             | 631.9  | 20f             | 582.0  |
| 21f             | 467.6  | 21f             | 445.9  | 21f             | 577.3  | 21f             | 444.8  | 21f             | 429.8  | 21f             | 467.6  | 21f             | 445.9  | 21f             | 577.3  | 21f             | 444.8  |
| 22f             | 444.3  | 22f             | 403.7  | 22f             | 518.7  | 22f             | 420.4  | 22f             | 382.2  | 22f             | 444.3  | 22f             | 403.7  | 22f             | 518.7  | 22f             | 420.4  |
| 23f             | 309.8  | 23f             | 354.0  | 23f             | 359.3  | 23f             | 352.0  | 23f             | 330.7  | 23f             | 309.8  | 23f             | 354.0  | 23f             | 359.3  | 23f             | 352.0  |
| 24f             | 270.6  | 24f             | 234.9  | 24f             | 313.1  | 24f             | 330.3  | 24f             | 205.5  | 24f             | 270.6  | 24f             | 234.9  | 24f             | 313.1  | 24f             | 330.3  |
| 25f             | 217.7  | 25f             | 175.1  | 25f             | 250.8  | 25f             | 190.2  | 25f             | 178.8  | 25f             | 217.7  | 25f             | 175.1  | 25f             | 250.8  | 25f             | 190.2  |
| 26f             | 200.2  | 26f             | 167.7  | 26f             | 230.6  | 26f             | 167.0  | 26f             | 164.0  | 26f             | 200.2  | 26f             | 167.7  | 26f             | 230.6  | 26f             | 167.0  |
| 27f             | 155.3  | 27f             | 127.6  | 27f             | 172.0  | 27f             | 153.5  | 27f             | 123.4  | 27f             | 155.3  | 27f             | 127.6  | 27f             | 172.0  | 27f             | 153.5  |
| 28f             | 149.0  | 28f             | 83.8   | 28f             | 102.1  | 28f             | 117.7  | 28f             | 106.1  | 28f             | 149.0  | 28f             | 83.8   | 28f             | 102.1  | 28f             | 117.7  |
| 29f             | 112.5  | 29f             | 54.7   | 29f             | 93.8   | 29f             | 88.6   | 29f             | 70.2   | 29f             | 112.5  | 29f             | 54.7   | 29f             | 93.8   | 29f             | 88.6   |
| 30f             | 68.8   | 30f             | 46.5   | 30f             | 63.5   | 30f             | 62.9   | 30f             | 54.6   | 30f             | 68.8   | 30f             | 46.5   | 30f             | 63.5   | 30f             | 62.9   |
| 31f             | 54.8   | 31f/i           | 24.6   | 31f             | 58.8   | 31f             | 35.8   | 31f             | 38.8   | 31f             | 54.8   | 31f/i           | 24.6   | 31f             | 58.8   | 31f             | 35.8   |
| 32f             | 20.8   | 32f/i           | 120.2  | 32f/i           | 37.0   | 32f             | 28.9   | 32f             | 91.0   | 32f             | 20.8   | 32f/i           | 120.2  | 32f/i           | 37.0   | 32f             | 28.9   |
| 33f/i           | 1366.1 | 33f/i           | 559.7  | 33f/i           | 1202.7 | 33f/i           | 668.0  | 33f/i           | 709.0  | 33f/i           | 1366.1 | 33f/i           | 559.7  | 33f/i           | 1202.7 | 33f/i           | 668.0  |

**Table S14.**

The results of frequency analysis of transition states on CoO-Cl surface

| TS <sub>1</sub> |        | TS <sub>2</sub> |        | TS <sub>3</sub> |        | TS <sub>4</sub> |        | TS <sub>7</sub> |        | TS <sub>5</sub> |        | TS <sub>6</sub> |        | TS <sub>8</sub> |        | TS <sub>9</sub> |        |
|-----------------|--------|-----------------|--------|-----------------|--------|-----------------|--------|-----------------|--------|-----------------|--------|-----------------|--------|-----------------|--------|-----------------|--------|
| 1f              | 3172.1 | 1f              | 3681.5 | 1f              | 3682.2 | 1f              | 3156.8 | 1f              | 3148.7 | 1f              | 3106.4 | 1f              | 3089.0 | 1f              | 3192.3 | 1f              | 3198.9 |
| 2f              | 3111.0 | 2f              | 3198.8 | 2f              | 3157.0 | 2f              | 3095.4 | 2f              | 3090.4 | 2f              | 3093.3 | 2f              | 3080.9 | 2f              | 3086.9 | 2f              | 3096.8 |
| 3f              | 3070.5 | 3f              | 3162.3 | 3f              | 3083.6 | 3f              | 3086.9 | 3f              | 3077.0 | 3f              | 3080.7 | 3f              | 3038.8 | 3f              | 3082.2 | 3f              | 3067.7 |
| 4f              | 3066.0 | 4f              | 3129.6 | 4f              | 3072.1 | 4f              | 3053.0 | 4f              | 3034.7 | 4f              | 3067.6 | 4f              | 2979.2 | 4f              | 3067.2 | 4f              | 3053.0 |
| 5f              | 2989.6 | 5f              | 3106.5 | 5f              | 2847.0 | 5f              | 3017.1 | 5f              | 3022.6 | 5f              | 3013.9 | 5f              | 2973.1 | 5f              | 3058.3 | 5f              | 3038.9 |
| 6f              | 1540.1 | 6f              | 3075.9 | 6f              | 2014.0 | 6f              | 2967.1 | 6f              | 3018.4 | 6f              | 2189.4 | 6f              | 2964.3 | 6f              | 2115.0 | 6f              | 3009.5 |
| 7f              | 1508.8 | 7f              | 1535.1 | 7f              | 1588.0 | 7f              | 1451.4 | 7f              | 1446.8 | 7f              | 1444.2 | 7f              | 1428.2 | 7f              | 1454.6 | 7f              | 1444.6 |
| 8f              | 1442.1 | 8f              | 1468.8 | 8f              | 1411.1 | 8f              | 1441.9 | 8f              | 1430.6 | 8f              | 1436.6 | 8f              | 1418.7 | 8f              | 1427.1 | 8f              | 1427.1 |
| 9f              | 1392.0 | 9f              | 1386.1 | 9f              | 1306.8 | 9f              | 1414.6 | 9f              | 1401.0 | 9f              | 1396.4 | 9f              | 1408.3 | 9f              | 1394.9 | 9f              | 1412.6 |
| 10f             | 1313.1 | 10f             | 1298.5 | 10f             | 1280.5 | 10f             | 1370.3 | 10f             | 1362.8 | 10f             | 1363.2 | 10f             | 1391.4 | 10f             | 1362.8 | 10f             | 1348.2 |
| 11f             | 1279.1 | 11f             | 1208.3 | 11f             | 1266.6 | 11f             | 1341.2 | 11f             | 1326.1 | 11f             | 1247.1 | 11f             | 1320.4 | 11f             | 1320.2 | 11f             | 1302.7 |
| 12f             | 1198.3 | 12f             | 1034.6 | 12f             | 1159.5 | 12f             | 1254.4 | 12f             | 1211.0 | 12f             | 1210.6 | 12f             | 1227.4 | 12f             | 1245.1 | 12f             | 1190.8 |
| 13f             | 1070.5 | 13f             | 993.5  | 13f             | 1089.7 | 13f             | 1199.5 | 13f             | 1176.2 | 13f             | 1175.3 | 13f             | 1193.4 | 13f             | 1089.5 | 13f             | 1131.1 |
| 14f             | 1021.9 | 14f             | 946.2  | 14f             | 1024.1 | 14f             | 1131.1 | 14f             | 1144.6 | 14f             | 1145.9 | 14f             | 1133.9 | 14f             | 1064.0 | 14f             | 1129.1 |
| 15f             | 954.4  | 15f             | 932.6  | 15f             | 941.1  | 15f             | 1086.5 | 15f             | 999.9  | 15f             | 1103.8 | 15f             | 1075.0 | 15f             | 987.4  | 15f             | 1016.4 |
| 16f             | 923.0  | 16f             | 924.3  | 16f             | 903.6  | 16f             | 986.9  | 16f             | 938.6  | 16f             | 1015.5 | 16f             | 1033.9 | 16f             | 954.7  | 16f             | 917.5  |
| 17f             | 912.1  | 17f             | 741.0  | 17f             | 869.5  | 17f             | 967.7  | 17f             | 917.8  | 17f             | 989.3  | 17f             | 945.4  | 17f             | 947.0  | 17f             | 898.8  |
| 18f             | 844.8  | 18f             | 713.9  | 18f             | 793.6  | 18f             | 940.6  | 18f             | 889.1  | 18f             | 939.5  | 18f             | 918.7  | 18f             | 872.1  | 18f             | 830.8  |
| 19f             | 726.3  | 19f             | 584.2  | 19f             | 737.1  | 19f             | 848.0  | 19f             | 832.8  | 19f             | 848.0  | 19f             | 833.7  | 19f             | 826.7  | 19f             | 789.3  |
| 20f             | 595.0  | 20f             | 529.3  | 20f             | 609.8  | 20f             | 718.8  | 20f             | 610.6  | 20f             | 823.5  | 20f             | 584.6  | 20f             | 718.7  | 20f             | 590.2  |
| 21f             | 535.8  | 21f             | 432.3  | 21f             | 502.0  | 21f             | 441.7  | 21f             | 445.0  | 21f             | 507.3  | 21f             | 501.2  | 21f             | 622.1  | 21f             | 512.4  |
| 22f             | 387.2  | 22f             | 423.7  | 22f             | 472.1  | 22f             | 384.0  | 22f             | 411.2  | 22f             | 463.7  | 22f             | 395.0  | 22f             | 544.5  | 22f             | 401.7  |
| 23f             | 270.8  | 23f             | 317.4  | 23f             | 380.7  | 23f             | 359.6  | 23f             | 359.2  | 23f             | 358.8  | 23f             | 377.0  | 23f             | 413.9  | 23f             | 368.5  |
| 24f             | 253.3  | 24f             | 296.6  | 24f             | 345.4  | 24f             | 251.5  | 24f             | 249.7  | 24f             | 295.0  | 24f             | 261.6  | 24f             | 378.4  | 24f             | 268.0  |
| 25f             | 188.1  | 25f             | 247.1  | 25f             | 310.4  | 25f             | 219.0  | 25f             | 239.6  | 25f             | 243.9  | 25f             | 255.4  | 25f             | 319.4  | 25f             | 252.0  |
| 26f             | 147.4  | 26f             | 213.9  | 26f             | 286.8  | 26f             | 170.4  | 26f             | 209.7  | 26f             | 222.1  | 26f             | 167.9  | 26f             | 266.7  | 26f             | 208.6  |
| 27f             | 147.0  | 27f             | 178.8  | 27f             | 246.9  | 27f             | 151.7  | 27f             | 180.2  | 27f             | 207.6  | 27f             | 132.8  | 27f             | 249.2  | 27f             | 191.8  |
| 28f             | 121.1  | 28f             | 174.9  | 28f             | 223.2  | 28f             | 134.3  | 28f             | 139.5  | 28f             | 175.3  | 28f             | 123.9  | 28f             | 210.4  | 28f             | 141.2  |
| 29f             | 114.4  | 29f             | 134.6  | 29f             | 182.1  | 29f             | 104.1  | 29f             | 119.9  | 29f             | 116.5  | 29f             | 88.1   | 29f             | 189.8  | 29f             | 95.7   |
| 30f             | 81.1   | 30f             | 116.7  | 30f             | 158.0  | 30f             | 92.5   | 30f             | 96.5   | 30f             | 105.8  | 30f             | 85.6   | 30f             | 131.0  | 30f             | 83.4   |
| 31f             | 74.7   | 31f             | 106.4  | 31f             | 124.8  | 31f             | 90.1   | 31f             | 86.4   | 31f             | 96.1   | 31f             | 83.0   | 31f             | 124.7  | 31f             | 74.5   |
| 32f             | 60.7   | 32f             | 85.1   | 32f             | 92.9   | 32f             | 84.5   | 32f             | 74.2   | 32f             | 85.3   | 32f             | 77.1   | 32f             | 90.6   | 32f             | 68.5   |
| 33f             | 42.9   | 33f             | 80.3   | 33f             | 74.5   | 33f             | 70.8   | 33f             | 69.2   | 33f             | 81.7   | 33f             | 43.0   | 33f             | 76.7   | 33f             | 33.3   |
| 34f             | 9.0    | 34f             | 71.8   | 34f/i           | 71.7   | 34f             | 16.6   | 34f             | 43.6   | 34f/i           | 49.5   | 34f/i           | 21.7   | 34f             | 64.2   | 34f/i           | 25.4   |
| 35f/i           | 46.6   | 35f             | 63.8   | 35f/i           | 67.4   | 35f/i           | 80.5   | 35f/i           | 29.8   | 35f/i           | 31.3   | 35f/i           | 60.8   | 35f             | 41.8   | 35f/i           | 50.5   |
| 36f/i           | 863.3  | 36f             | 264.4  | 36f/i           | 333.6  | 36f/i           | 350.7  | 36f/i           | 445.9  | 36f/i           | 817.4  | 36f/i           | 550.0  | 36f/i           | 818.3  | 36f/i           | 652.3  |



**Table S15.**

The results of frequency analysis of transition states on CoCuO-Cl surface

| TS <sub>1</sub> |        | TS <sub>2</sub> |        | TS <sub>3</sub> |        | TS <sub>4</sub> |        | TS <sub>7</sub> |        | TS <sub>5</sub> |        | TS <sub>6</sub> |        | TS <sub>8</sub> |        | TS <sub>9</sub> |        |
|-----------------|--------|-----------------|--------|-----------------|--------|-----------------|--------|-----------------|--------|-----------------|--------|-----------------|--------|-----------------|--------|-----------------|--------|
| 1f              | 3146.6 | 1f              | 3525.4 | 1f              | 3685.3 | 1f              | 3083.0 | 1f              | 3161.5 | 1f              | 3078.1 | 1f              | 3108.2 | 1f              | 3182.2 | 1f              | 3204.5 |
| 2f              | 3094.6 | 2f              | 3230.9 | 2f              | 3157.5 | 2f              | 3073.5 | 2f              | 3075.4 | 2f              | 3063.6 | 2f              | 3082.8 | 2f              | 3081.2 | 2f              | 3084.0 |
| 3f              | 3071.8 | 3f              | 3180.6 | 3f              | 3074.8 | 3f              | 3060.0 | 3f              | 3051.8 | 3f              | 3007.0 | 3f              | 3015.7 | 3f              | 3063.7 | 3f              | 3073.2 |
| 4f              | 3050.9 | 4f              | 3084.4 | 4f              | 3068.2 | 4f              | 3005.6 | 4f              | 3046.6 | 4f              | 2999.1 | 4f              | 3013.2 | 4f              | 3049.6 | 4f              | 3065.5 |
| 5f              | 2950.5 | 5f              | 3081.4 | 5f              | 2791.5 | 5f              | 2959.1 | 5f              | 3034.3 | 5f              | 2942.1 | 5f              | 2955.3 | 5f              | 2973.6 | 5f              | 2984.0 |
| 6f              | 1574.8 | 6f              | 3078.9 | 6f              | 2241.8 | 6f              | 2803.9 | 6f              | 2961.8 | 6f              | 2355.5 | 6f              | 2910.3 | 6f              | 2119.6 | 6f              | 2968.8 |
| 7f              | 1487.9 | 7f              | 1501.1 | 7f              | 1614.5 | 7f              | 1459.8 | 7f              | 1451.1 | 7f              | 1464.9 | 7f              | 1446.4 | 7f              | 1434.1 | 7f              | 1448.5 |
| 8f              | 1423.9 | 8f              | 1461.1 | 8f              | 1400.2 | 8f              | 1402.5 | 8f              | 1436.4 | 8f              | 1411.2 | 8f              | 1436.2 | 8f              | 1402.6 | 8f              | 1433.8 |
| 9f              | 1392.7 | 9f              | 1385.0 | 9f              | 1280.9 | 9f              | 1382.4 | 9f              | 1410.7 | 9f              | 1393.1 | 9f              | 1391.2 | 9f              | 1389.7 | 9f              | 1412.7 |
| 10f             | 1329.0 | 10f             | 1329.3 | 10f             | 1266.4 | 10f             | 1351.5 | 10f             | 1372.0 | 10f             | 1330.6 | 10f             | 1356.2 | 10f             | 1365.2 | 10f             | 1364.4 |
| 11f             | 1295.2 | 11f             | 1249.0 | 11f             | 1254.7 | 11f             | 1336.1 | 11f             | 1341.6 | 11f             | 1250.1 | 11f             | 1319.1 | 11f             | 1295.5 | 11f             | 1339.0 |
| 12f             | 1256.6 | 12f             | 1231.5 | 12f             | 1154.9 | 12f             | 1212.5 | 12f             | 1305.1 | 12f             | 1207.1 | 12f             | 1261.7 | 12f             | 1256.7 | 12f             | 1243.2 |
| 13f             | 1183.9 | 13f             | 1031.6 | 13f             | 1086.2 | 13f             | 1179.7 | 13f             | 1184.2 | 13f             | 1168.8 | 13f             | 1184.1 | 13f             | 1122.4 | 13f             | 1168.2 |
| 14f             | 1040.8 | 14f             | 977.9  | 14f             | 1011.9 | 14f             | 1142.2 | 14f             | 1141.7 | 14f             | 1142.4 | 14f             | 1166.7 | 14f             | 1046.4 | 14f             | 1129.9 |
| 15f             | 977.0  | 15f             | 957.8  | 15f             | 982.2  | 15f             | 1085.0 | 15f             | 996.1  | 15f             | 1122.6 | 15f             | 1124.2 | 15f             | 1005.7 | 15f             | 1042.0 |
| 16f             | 954.3  | 16f             | 926.2  | 16f             | 934.2  | 16f             | 988.8  | 16f             | 931.4  | 16f             | 1001.4 | 16f             | 1013.5 | 16f             | 971.7  | 16f             | 906.6  |
| 17f             | 933.9  | 17f             | 897.1  | 17f             | 876.6  | 17f             | 946.9  | 17f             | 896.7  | 17f             | 954.1  | 17f             | 943.2  | 17f             | 910.3  | 17f             | 887.3  |
| 18f             | 910.6  | 18f             | 842.4  | 18f             | 788.1  | 18f             | 895.4  | 18f             | 886.1  | 18f             | 907.1  | 18f             | 892.9  | 18f             | 865.7  | 18f             | 837.9  |
| 19f             | 656.9  | 19f             | 632.0  | 19f             | 751.4  | 19f             | 790.4  | 19f             | 824.8  | 19f             | 851.4  | 19f             | 872.2  | 19f             | 811.1  | 19f             | 815.2  |
| 20f             | 603.0  | 20f             | 594.0  | 20f             | 611.2  | 20f             | 681.5  | 20f             | 614.9  | 20f             | 795.9  | 20f             | 690.9  | 20f             | 654.1  | 20f             | 568.4  |
| 21f             | 489.6  | 21f             | 403.2  | 21f             | 452.3  | 21f             | 419.9  | 21f             | 450.3  | 21f             | 462.9  | 21f             | 453.8  | 21f             | 578.1  | 21f             | 418.2  |
| 22f             | 404.9  | 22f             | 305.8  | 22f             | 434.0  | 22f             | 387.3  | 22f             | 382.7  | 22f             | 450.2  | 22f             | 400.9  | 22f             | 522.0  | 22f             | 408.2  |
| 23f             | 288.4  | 23f             | 234.0  | 23f             | 393.3  | 23f             | 247.3  | 23f             | 342.0  | 23f             | 276.7  | 23f             | 364.8  | 23f             | 370.5  | 23f             | 350.2  |
| 24f             | 254.9  | 24f             | 221.8  | 24f             | 334.4  | 24f             | 223.5  | 24f             | 250.1  | 24f             | 244.4  | 24f             | 253.1  | 24f             | 315.4  | 24f             | 309.0  |
| 25f             | 210.9  | 25f             | 216.2  | 25f             | 266.2  | 25f             | 187.8  | 25f             | 182.8  | 25f             | 236.8  | 25f             | 237.7  | 25f             | 268.2  | 25f             | 258.7  |
| 26f             | 142.0  | 26f             | 166.6  | 26f             | 259.5  | 26f             | 154.0  | 26f             | 173.8  | 26f             | 203.2  | 26f             | 198.6  | 26f             | 248.4  | 26f             | 210.7  |
| 27f             | 109.0  | 27f             | 133.7  | 27f             | 193.6  | 27f             | 110.6  | 27f             | 160.1  | 27f             | 177.6  | 27f             | 160.5  | 27f             | 219.6  | 27f             | 186.3  |
| 28f             | 100.8  | 28f             | 114.9  | 28f             | 132.4  | 28f             | 89.3   | 28f             | 111.1  | 28f             | 133.6  | 28f             | 115.8  | 28f             | 186.0  | 28f             | 156.5  |
| 29f             | 78.7   | 29f             | 94.2   | 29f             | 119.4  | 29f             | 72.1   | 29f             | 102.0  | 29f             | 117.6  | 29f             | 91.8   | 29f             | 114.9  | 29f             | 122.8  |
| 30f             | 66.8   | 30f             | 77.1   | 30f             | 104.7  | 30f             | 65.4   | 30f             | 74.3   | 30f             | 81.4   | 30f             | 76.0   | 30f             | 100.7  | 30f             | 76.1   |
| 31f             | 54.3   | 31f             | 71.1   | 31f             | 78.3   | 31f             | 48.5   | 31f             | 71.8   | 31f             | 71.3   | 31f             | 68.2   | 31f             | 85.3   | 31f             | 67.9   |
| 32f             | 46.6   | 32f             | 62.1   | 32f             | 68.3   | 32f             | 38.4   | 32f             | 69.8   | 32f             | 68.3   | 32f             | 53.1   | 32f             | 77.0   | 32f             | 63.9   |
| 33f             | 12.2   | 33f             | 44.5   | 33f             | 61.1   | 33f/i           | 29.7   | 33f             | 59.6   | 33f             | 44.8   | 33f             | 35.2   | 33f             | 72.6   | 33f             | 58.5   |
| 34f/i           | 8.0    | 34f             | 32.6   | 34f             | 53.3   | 34f/i           | 48.5   | 34f             | 43.1   | 34f/i           | 37.6   | 34f/i           | 27.1   | 34f             | 63.8   | 34f             | 53.9   |
| 35f/i           | 42.0   | 35f/i           | 50.8   | 35f             | 11.1   | 35f/i           | 56.7   | 35f/i           | 72.1   | 35f/i           | 50.8   | 35f/i           | 50.4   | 35f             | 45.6   | 35f             | 15.2   |
| 36f/i           | 1606.5 | 35f/i           | 260.0  | 36f/i           | 174.6  | 36f/i           | 466.7  | 36f/i           | 366.5  | 36f/i           | 821.2  | 36f/i           | 513.7  | 36f/i           | 1208.7 | 36f/i           | 629.0  |

**Table S16.**

The results of frequency analysis of transition states on LaO surface

| TS <sub>1</sub> |        | TS <sub>2</sub> |        | TS <sub>3</sub> |        | TS <sub>4</sub> |        | TS <sub>7</sub> |        | TS <sub>5</sub> |        | TS <sub>6</sub> |        | TS <sub>8</sub> |        | TS <sub>9</sub> |        |
|-----------------|--------|-----------------|--------|-----------------|--------|-----------------|--------|-----------------|--------|-----------------|--------|-----------------|--------|-----------------|--------|-----------------|--------|
| 1f              | 3147.0 | 1f              | 3740.5 | 1f              | 3705.1 | 1f              | 3133.9 | 1f              | 3172.1 | 1f              | 3072.6 | 1f              | 3049.0 | 1f              | 3165.2 | 1f              | 3189.2 |
| 2f              | 3072.9 | 2f              | 3192.8 | 2f              | 3157.8 | 2f              | 3043.5 | 2f              | 3064.0 | 2f              | 3035.6 | 2f              | 3031.6 | 2f              | 3102.8 | 2f              | 3074.7 |
| 3f              | 3058.1 | 3f              | 3174.8 | 3f              | 3073.3 | 3f              | 3034.4 | 3f              | 3056.7 | 3f              | 3024.4 | 3f              | 2993.3 | 3f              | 3051.4 | 3f              | 3060.8 |
| 4f              | 3050.2 | 4f              | 3093.5 | 4f              | 2978.9 | 4f              | 3007.9 | 4f              | 3046.3 | 4f              | 2961.0 | 4f              | 2974.8 | 4f              | 3034.1 | 4f              | 3037.6 |
| 5f              | 3019.8 | 5f              | 3075.6 | 5f              | 2845.7 | 5f              | 2987.6 | 5f              | 3008.4 | 5f              | 2895.0 | 5f              | 2916.6 | 5f              | 2946.9 | 5f              | 2954.0 |
| 6f              | 2963.6 | 6f              | 3067.4 | 6f              | 1632.4 | 6f              | 2918.7 | 6f              | 2939.6 | 6f              | 1665.9 | 6f              | 2906.6 | 6f              | 2360.3 | 6f              | 2946.0 |
| 7f              | 1640.1 | 7f              | 1473.7 | 7f              | 1433.3 | 7f              | 1449.9 | 7f              | 1451.0 | 7f              | 1555.6 | 7f              | 1448.9 | 7f              | 1452.1 | 7f              | 1452.2 |
| 8f              | 1443.6 | 8f              | 1466.7 | 8f              | 1399.3 | 8f              | 1429.7 | 8f              | 1445.8 | 8f              | 1438.7 | 8f              | 1426.5 | 8f              | 1426.8 | 8f              | 1440.5 |
| 9f              | 1420.0 | 9f              | 1378.0 | 9f              | 1345.5 | 9f              | 1421.9 | 9f              | 1416.3 | 9f              | 1432.3 | 9f              | 1420.2 | 9f              | 1394.7 | 9f              | 1399.2 |
| 10f             | 1396.4 | 10f             | 1237.8 | 10f             | 1275.0 | 10f             | 1373.3 | 10f             | 1359.6 | 10f             | 1352.9 | 10f             | 1373.0 | 10f             | 1340.5 | 10f             | 1351.2 |
| 11f             | 1343.3 | 11f             | 1199.6 | 11f             | 1265.9 | 11f             | 1340.1 | 11f             | 1331.9 | 11f             | 1342.1 | 11f             | 1333.7 | 11f             | 1304.6 | 11f             | 1322.1 |
| 12f             | 1287.4 | 12f             | 1013.2 | 12f             | 1138.1 | 12f             | 1202.9 | 12f             | 1189.0 | 12f             | 1290.5 | 12f             | 1268.1 | 12f             | 1187.9 | 12f             | 1226.5 |
| 13f             | 1162.0 | 13f             | 968.7  | 13f             | 1095.6 | 13f             | 1154.3 | 13f             | 1146.4 | 13f             | 1137.9 | 13f             | 1173.4 | 13f             | 1044.6 | 13f             | 1144.3 |
| 14f             | 1075.9 | 14f             | 906.7  | 14f             | 1010.3 | 14f             | 1112.4 | 14f             | 1120.6 | 14f             | 1107.1 | 14f             | 1162.3 | 14f             | 998.8  | 14f             | 1138.4 |
| 15f             | 1032.0 | 15f             | 786.8  | 15f             | 973.8  | 15f             | 1011.9 | 15f             | 983.8  | 15f             | 1047.9 | 15f             | 1110.0 | 15f             | 938.6  | 15f             | 1031.6 |
| 16f             | 999.5  | 16f             | 743.6  | 16f             | 924.3  | 16f             | 961.1  | 16f             | 911.0  | 16f             | 1014.4 | 16f             | 1018.7 | 16f             | 891.5  | 16f             | 901.0  |
| 17f             | 923.4  | 17f             | 547.5  | 17f             | 906.7  | 17f             | 910.3  | 17f             | 886.8  | 17f             | 963.0  | 17f             | 950.0  | 17f             | 803.7  | 17f             | 873.7  |
| 18f             | 913.3  | 18f             | 530.7  | 18f             | 747.8  | 18f             | 884.7  | 18f             | 835.1  | 18f             | 866.1  | 18f             | 904.5  | 18f             | 744.4  | 18f             | 823.7  |
| 19f             | 898.8  | 19f             | 498.9  | 19f             | 656.2  | 19f             | 848.7  | 19f             | 647.3  | 19f             | 740.8  | 19f             | 885.9  | 19f             | 615.5  | 19f             | 593.6  |
| 20f             | 589.2  | 20f             | 411.7  | 20f             | 487.0  | 20f             | 736.5  | 20f             | 502.6  | 20f             | 680.8  | 20f             | 633.3  | 20f             | 519.7  | 20f             | 474.2  |
| 21f             | 404.1  | 21f             | 338.9  | 21f             | 440.0  | 21f             | 425.1  | 21f             | 476.7  | 21f             | 462.5  | 21f             | 399.4  | 21f             | 468.0  | 21f             | 424.8  |
| 22f             | 368.7  | 22f             | 299.6  | 22f             | 378.1  | 22f             | 348.2  | 22f             | 398.6  | 22f             | 399.0  | 22f             | 380.7  | 22f             | 371.6  | 22f             | 408.6  |
| 23f             | 203.1  | 23f             | 282.2  | 23f             | 343.8  | 23f             | 329.1  | 23f             | 327.6  | 23f             | 361.7  | 23f             | 295.7  | 23f             | 359.0  | 23f             | 358.2  |
| 24f             | 201.5  | 24f             | 183.8  | 24f             | 289.8  | 24f             | 265.1  | 24f             | 244.1  | 24f             | 291.2  | 24f             | 281.5  | 24f             | 302.8  | 24f             | 327.5  |
| 25f             | 113.0  | 25f             | 176.2  | 25f             | 225.6  | 25f             | 186.3  | 25f             | 221.5  | 25f             | 223.8  | 25f             | 228.8  | 25f             | 207.8  | 25f             | 279.8  |
| 26f             | 110.2  | 26f             | 164.9  | 26f             | 188.9  | 26f             | 159.1  | 26f             | 175.8  | 26f             | 160.1  | 26f             | 205.5  | 26f             | 188.1  | 26f             | 252.7  |
| 27f             | 87.8   | 27f             | 59.1   | 27f             | 144.4  | 27f             | 147.3  | 27f             | 163.9  | 27f             | 132.3  | 27f             | 127.3  | 27f             | 156.8  | 27f             | 174.6  |
| 28f             | 78.5   | 28f             | 53.4   | 28f             | 114.7  | 28f             | 99.9   | 28f             | 123.4  | 28f             | 101.6  | 28f             | 94.8   | 28f             | 114.9  | 28f             | 117.6  |
| 29f             | 41.9   | 29f             | 47.2   | 29f             | 79.9   | 29f             | 62.2   | 29f             | 91.6   | 29f             | 61.2   | 29f             | 73.3   | 29f             | 93.1   | 29f             | 110.9  |
| 30f             | 36.2   | 30f             | 36.1   | 30f             | 72.1   | 30f             | 60.8   | 30f             | 51.5   | 30f             | 33.8   | 30f             | 63.9   | 30f             | 74.5   | 30f             | 60.6   |
| 31f             | 15.1   | 31f             | 32.6   | 31f             | 52.0   | 31f/i           | 27.5   | 31f/i           | 16.1   | 31f             | 47.3   | 31f             | 49.7   | 31f             | 33.9   | 31f             | 24.6   |
| 32f/i           | 25.6   | 32f/i           | 10.0   | 32f             | 42.1   | 32f/i           | 52.8   | 32f/i           | 51.5   | 32f/i           | 5.6    | 32f/i           | 30.1   | 32f/i           | 19.0   | 32f/i           | 42.0   |
| 33f/i           | 669.9  | 33f/i           | 183.7  | 33f/i           | 1327.8 | 33f/i           | 471.3  | 33f/i           | 415.3  | 33f/i           | 907.7  | 33f/i           | 392.5  | 33f/i           | 1058.5 | 33f/i           | 398.2  |

**Table S17.**

The results of frequency analysis of transition states on LaCuO surface

| TS <sub>1</sub> |        | TS <sub>2</sub> |        | TS <sub>3</sub> |        | TS <sub>4</sub> |        | TS <sub>7</sub> |        | TS <sub>5</sub> |        | TS <sub>6</sub> |        | TS <sub>8</sub> |        | TS <sub>9</sub> |        |
|-----------------|--------|-----------------|--------|-----------------|--------|-----------------|--------|-----------------|--------|-----------------|--------|-----------------|--------|-----------------|--------|-----------------|--------|
| 1f              | 3156.5 | 1f              | 3719.1 | 1f              | 3713.4 | 1f              | 3136.5 | 1f              | 3169.1 | 1f              | 3107.2 | 1f              | 3061.4 | 1f              | 3158.9 | 1f              | 3165.6 |
| 2f              | 3104.4 | 2f              | 3184.0 | 2f              | 3152.4 | 2f              | 3048.9 | 2f              | 3064.0 | 2f              | 3072.8 | 2f              | 3042.7 | 2f              | 3106.7 | 2f              | 3075.5 |
| 3f              | 3065.3 | 3f              | 3145.4 | 3f              | 3072.1 | 3f              | 3048.4 | 3f              | 3047.8 | 3f              | 2992.0 | 3f              | 2996.7 | 3f              | 3051.2 | 3f              | 3041.9 |
| 4f              | 3062.6 | 4f              | 3077.3 | 4f              | 2974.0 | 4f              | 3028.4 | 4f              | 3042.6 | 4f              | 2921.3 | 4f              | 2980.1 | 4f              | 3044.4 | 4f              | 3039.5 |
| 5f              | 3014.7 | 5f              | 3063.9 | 5f              | 2835.3 | 5f              | 2988.1 | 5f              | 3012.0 | 5f              | 2837.3 | 5f              | 2923.6 | 5f              | 2972.2 | 5f              | 3023.7 |
| 6f              | 1541.9 | 6f              | 3044.1 | 6f              | 1627.1 | 6f              | 2917.4 | 6f              | 2945.5 | 6f              | 2016.0 | 6f              | 2896.1 | 6f              | 2389.8 | 6f              | 2929.7 |
| 7f              | 1434.9 | 7f              | 1476.0 | 7f              | 1431.8 | 7f              | 1455.6 | 7f              | 1454.0 | 7f              | 1444.5 | 7f              | 1452.8 | 7f              | 1450.3 | 7f              | 1476.1 |
| 8f              | 1416.9 | 8f              | 1471.4 | 8f              | 1404.1 | 8f              | 1425.2 | 8f              | 1449.2 | 8f              | 1402.9 | 8f              | 1432.2 | 8f              | 1428.4 | 8f              | 1447.0 |
| 9f              | 1375.6 | 9f              | 1386.6 | 9f              | 1314.1 | 9f              | 1415.8 | 9f              | 1420.3 | 9f              | 1397.1 | 9f              | 1415.7 | 9f              | 1396.9 | 9f              | 1412.3 |
| 10f             | 1260.9 | 10f             | 1232.2 | 10f             | 1275.0 | 10f             | 1365.1 | 10f             | 1359.5 | 10f             | 1367.1 | 10f             | 1376.9 | 10f             | 1342.5 | 10f             | 1368.3 |
| 11f             | 1198.0 | 11f             | 1200.5 | 11f             | 1250.6 | 11f             | 1341.5 | 11f             | 1329.5 | 11f             | 1323.8 | 11f             | 1332.0 | 11f             | 1261.2 | 11f             | 1324.8 |
| 12f             | 1086.9 | 12f             | 1022.8 | 12f             | 1143.9 | 12f             | 1199.3 | 12f             | 1201.0 | 12f             | 1235.5 | 12f             | 1255.4 | 12f             | 1196.5 | 12f             | 1246.8 |
| 13f             | 1082.9 | 13f             | 983.4  | 13f             | 1095.6 | 13f             | 1152.9 | 13f             | 1146.6 | 13f             | 1111.7 | 13f             | 1174.2 | 13f             | 1053.3 | 13f             | 1168.5 |
| 14f             | 999.1  | 14f             | 913.1  | 14f             | 1016.3 | 14f             | 1096.8 | 14f             | 1129.5 | 14f             | 1096.6 | 14f             | 1163.9 | 14f             | 994.3  | 14f             | 1145.0 |
| 15f             | 957.9  | 15f             | 810.4  | 15f             | 981.8  | 15f             | 1005.6 | 15f             | 985.3  | 15f             | 1025.4 | 15f             | 1109.6 | 15f             | 967.7  | 15f             | 1085.9 |
| 16f             | 926.6  | 16f             | 750.7  | 16f             | 917.4  | 16f             | 967.4  | 16f             | 916.7  | 16f             | 983.7  | 16f             | 1033.5 | 16f             | 892.4  | 16f             | 942.6  |
| 17f             | 911.0  | 17f             | 546.3  | 17f             | 900.9  | 17f             | 902.3  | 17f             | 898.2  | 17f             | 921.8  | 17f             | 943.1  | 17f             | 812.1  | 17f             | 912.2  |
| 18f             | 836.8  | 18f             | 517.8  | 18f             | 748.3  | 18f             | 875.6  | 18f             | 855.2  | 18f             | 909.3  | 18f             | 905.5  | 18f             | 752.0  | 18f             | 862.7  |
| 19f             | 653.2  | 19f             | 489.3  | 19f             | 646.5  | 19f             | 852.2  | 19f             | 637.2  | 19f             | 711.6  | 19f             | 880.6  | 19f             | 614.4  | 19f             | 815.0  |
| 20f             | 621.2  | 20f             | 411.3  | 20f             | 498.9  | 20f             | 709.5  | 20f             | 514.6  | 20f             | 666.1  | 20f             | 692.9  | 20f             | 518.0  | 20f             | 707.2  |
| 21f             | 464.9  | 21f             | 400.1  | 21f             | 437.1  | 21f             | 431.7  | 21f             | 479.8  | 21f             | 420.8  | 21f             | 389.3  | 21f             | 495.9  | 21f             | 440.7  |
| 22f             | 364.3  | 22f             | 365.2  | 22f             | 368.3  | 22f             | 365.5  | 22f             | 382.6  | 22f             | 339.4  | 22f             | 364.7  | 22f             | 383.3  | 22f             | 398.6  |
| 23f             | 286.5  | 23f             | 330.3  | 23f             | 298.3  | 23f             | 318.4  | 23f             | 310.8  | 23f             | 276.2  | 23f             | 313.8  | 23f             | 314.8  | 23f             | 386.5  |
| 24f             | 263.0  | 24f             | 314.0  | 24f             | 278.0  | 24f             | 252.1  | 24f             | 244.3  | 24f             | 263.0  | 24f             | 270.1  | 24f             | 255.0  | 24f             | 357.1  |
| 25f             | 228.9  | 25f             | 146.0  | 25f             | 236.8  | 25f             | 186.2  | 25f             | 225.3  | 25f             | 173.5  | 25f             | 205.9  | 25f             | 229.3  | 25f             | 295.4  |
| 26f             | 183.1  | 26f             | 124.9  | 26f             | 190.6  | 26f             | 161.3  | 26f             | 200.9  | 26f             | 155.4  | 26f             | 173.6  | 26f             | 161.4  | 26f             | 282.5  |
| 27f             | 154.7  | 27f             | 82.3   | 27f             | 127.6  | 27f             | 128.8  | 27f             | 185.0  | 27f             | 121.3  | 27f             | 119.6  | 27f             | 139.3  | 27f             | 204.3  |
| 28f             | 130.8  | 28f             | 78.9   | 28f             | 89.3   | 28f             | 88.4   | 28f             | 107.6  | 28f             | 99.5   | 28f             | 102.1  | 28f             | 114.4  | 28f             | 164.1  |
| 29f             | 96.1   | 29f             | 52.4   | 29f             | 61.8   | 29f             | 70.1   | 29f             | 75.9   | 29f             | 56.6   | 29f             | 74.4   | 29f             | 65.8   | 29f             | 144.0  |
| 30f             | 66.1   | 30f             | 28.3   | 30f             | 42.8   | 30f             | 43.3   | 30f             | 50.4   | 30f             | 29.6   | 30f             | 42.6   | 30f             | 32.9   | 30f             | 98.7   |
| 31f             | 52.0   | 31f/i           | 47.6   | 31f             | 31.9   | 31f             | 17.3   | 31f/i           | 45.0   | 31f/i           | 68.2   | 31f             | 16.0   | 31f/i           | 11.9   | 31f             | 38.5   |
| 32f/i           | 21.6   | 32f/i           | 59.5   | 32f/i           | 58.1   | 32f             | 6.8    | 32f/i           | 57.4   | 32f/i           | 192.8  | 32f/i           | 42.6   | 32f/i           | 101.6  | 32f             | 33.3   |
| 33f/i           | 1270.7 | 33f/i           | 146.3  | 33f/i           | 1257.8 | 33f/i           | 508.7  | 33f/i           | 426.0  | 33f/i           | 1044.2 | 33f/i           | 564.6  | 33f/i           | 1060.0 | 33f/i           | 246.4  |

**Table S18.**

The results of frequency analysis of transition states on LaO-Cl surface

| TS <sub>1</sub> |        | TS <sub>2</sub> |        | TS <sub>3</sub> |        | TS <sub>4</sub> |        | TS <sub>7</sub> |        | TS <sub>5</sub> |        | TS <sub>6</sub> |        | TS <sub>8</sub> |        | TS <sub>9</sub> |        |
|-----------------|--------|-----------------|--------|-----------------|--------|-----------------|--------|-----------------|--------|-----------------|--------|-----------------|--------|-----------------|--------|-----------------|--------|
| 1f              | 3143.7 | 1f              | 3739.5 | 1f              | 3679.0 | 1f              | 3143.2 | 1f              | 3165.6 | 1f              | 3113.7 | 1f              | 3066.1 | 1f              | 3182.2 | 1f              | 3166.0 |
| 2f              | 3099.5 | 2f              | 3206.7 | 2f              | 3141.4 | 2f              | 3086.0 | 2f              | 3095.9 | 2f              | 3076.8 | 2f              | 3034.5 | 2f              | 3081.2 | 2f              | 3084.2 |
| 3f              | 3075.6 | 3f              | 3162.3 | 3f              | 3092.3 | 3f              | 3076.9 | 3f              | 3073.4 | 3f              | 3044.4 | 3f              | 3008.5 | 3f              | 3063.7 | 3f              | 3077.2 |
| 4f              | 3066.7 | 4f              | 3079.9 | 4f              | 2995.6 | 4f              | 3037.2 | 4f              | 3057.6 | 4f              | 2961.3 | 4f              | 2994.2 | 4f              | 3049.6 | 4f              | 3064.5 |
| 5f              | 2990.3 | 5f              | 3061.8 | 5f              | 2873.1 | 5f              | 3008.4 | 5f              | 3031.7 | 5f              | 2857.6 | 5f              | 2964.2 | 5f              | 2973.6 | 5f              | 2977.7 |
| 6f              | 1563.9 | 6f              | 3017.9 | 6f              | 1634.1 | 6f              | 2962.5 | 6f              | 2990.3 | 6f              | 2033.1 | 6f              | 2956.4 | 6f              | 2119.6 | 6f              | 2925.5 |
| 7f              | 1437.4 | 7f              | 1485.3 | 7f              | 1533.3 | 7f              | 1472.0 | 7f              | 1454.1 | 7f              | 1458.2 | 7f              | 1463.7 | 7f              | 1434.1 | 7f              | 1452.9 |
| 8f              | 1414.5 | 8f              | 1469.6 | 8f              | 1413.2 | 8f              | 1432.8 | 8f              | 1450.1 | 8f              | 1418.2 | 8f              | 1439.6 | 8f              | 1402.6 | 8f              | 1441.0 |
| 9f              | 1382.8 | 9f              | 1383.0 | 9f              | 1315.5 | 9f              | 1412.3 | 9f              | 1431.1 | 9f              | 1400.6 | 9f              | 1428.6 | 9f              | 1389.7 | 9f              | 1401.7 |
| 10f             | 1279.2 | 10f             | 1239.2 | 10f             | 1289.3 | 10f             | 1375.1 | 10f             | 1367.1 | 10f             | 1379.6 | 10f             | 1371.8 | 10f             | 1365.2 | 10f             | 1356.9 |
| 11f             | 1204.9 | 11f             | 1206.4 | 11f             | 1274.5 | 11f             | 1338.4 | 11f             | 1333.1 | 11f             | 1333.0 | 11f             | 1341.3 | 11f             | 1295.5 | 11f             | 1328.0 |
| 12f             | 1139.3 | 12f             | 1020.4 | 12f             | 1159.3 | 12f             | 1190.6 | 12f             | 1209.9 | 12f             | 1244.2 | 12f             | 1274.0 | 12f             | 1256.7 | 12f             | 1246.3 |
| 13f             | 1035.7 | 13f             | 993.2  | 13f             | 1106.7 | 13f             | 1163.2 | 13f             | 1157.4 | 13f             | 1141.0 | 13f             | 1183.2 | 13f             | 1122.4 | 13f             | 1143.6 |
| 14f             | 1021.8 | 14f             | 911.5  | 14f             | 1023.8 | 14f             | 1103.2 | 14f             | 1139.4 | 14f             | 1107.8 | 14f             | 1163.2 | 14f             | 1046.4 | 14f             | 1108.9 |
| 15f             | 952.5  | 15f             | 815.4  | 15f             | 1012.3 | 15f             | 995.6  | 15f             | 986.2  | 15f             | 1035.5 | 15f             | 1115.9 | 15f             | 1005.7 | 15f             | 1019.1 |
| 16f             | 941.1  | 16f             | 778.5  | 16f             | 943.3  | 16f             | 959.7  | 16f             | 954.8  | 16f             | 1002.0 | 16f             | 1022.9 | 16f             | 971.7  | 16f             | 905.9  |
| 17f             | 930.4  | 17f             | 550.1  | 17f             | 918.3  | 17f             | 906.7  | 17f             | 921.2  | 17f             | 941.7  | 17f             | 959.2  | 17f             | 910.3  | 17f             | 873.5  |
| 18f             | 843.1  | 18f             | 529.1  | 18f             | 783.3  | 18f             | 878.1  | 18f             | 891.7  | 18f             | 920.1  | 18f             | 916.0  | 18f             | 865.7  | 18f             | 799.6  |
| 19f             | 679.5  | 19f             | 500.1  | 19f             | 679.8  | 19f             | 862.9  | 19f             | 664.7  | 19f             | 746.7  | 19f             | 877.8  | 19f             | 811.1  | 19f             | 746.4  |
| 20f             | 645.6  | 20f             | 412.1  | 20f             | 553.5  | 20f             | 743.1  | 20f             | 519.6  | 20f             | 684.6  | 20f             | 640.1  | 20f             | 654.1  | 20f             | 603.2  |
| 21f             | 471.1  | 21f             | 360.1  | 21f             | 483.9  | 21f             | 440.8  | 21f             | 484.2  | 21f             | 444.1  | 21f             | 400.8  | 21f             | 578.1  | 21f             | 505.7  |
| 22f             | 358.3  | 22f             | 318.1  | 22f             | 404.3  | 22f             | 343.4  | 22f             | 397.4  | 22f             | 333.5  | 22f             | 381.6  | 22f             | 522.0  | 22f             | 412.3  |
| 23f             | 286.4  | 23f             | 291.7  | 23f             | 364.9  | 23f             | 323.8  | 23f             | 310.1  | 23f             | 293.4  | 23f             | 304.2  | 23f             | 370.5  | 23f             | 346.2  |
| 24f             | 260.5  | 24f             | 222.7  | 24f             | 268.9  | 24f             | 260.7  | 24f             | 266.7  | 24f             | 275.2  | 24f             | 272.4  | 24f             | 315.4  | 24f             | 312.5  |
| 25f             | 217.7  | 25f             | 170.7  | 25f             | 240.6  | 25f             | 216.7  | 25f             | 261.0  | 25f             | 204.1  | 25f             | 237.9  | 25f             | 268.2  | 25f             | 282.3  |
| 26f             | 179.7  | 26f             | 151.3  | 26f             | 197.7  | 26f             | 170.9  | 26f             | 221.2  | 26f             | 173.0  | 26f             | 183.0  | 26f             | 248.4  | 26f             | 265.4  |
| 27f             | 176.7  | 27f             | 129.5  | 27f             | 180.6  | 27f             | 168.4  | 27f             | 197.9  | 27f             | 165.0  | 27f             | 159.2  | 27f             | 219.6  | 27f             | 172.5  |
| 28f             | 148.1  | 28f             | 111.8  | 28f             | 165.5  | 28f             | 132.9  | 28f             | 168.2  | 28f             | 158.8  | 28f             | 153.1  | 28f             | 186.0  | 28f             | 156.0  |
| 29f             | 114.5  | 29f             | 83.5   | 29f             | 135.9  | 29f             | 106.8  | 29f             | 110.9  | 29f             | 143.4  | 29f             | 146.5  | 29f             | 114.9  | 29f             | 143.8  |
| 30f             | 104.7  | 30f             | 72.5   | 30f             | 96.5   | 30f             | 85.7   | 30f             | 98.1   | 30f             | 112.8  | 30f             | 109.8  | 30f             | 100.7  | 30f             | 104.5  |
| 31f             | 62.3   | 31f             | 82.6   | 31f             | 87.8   | 31f             | 62.9   | 31f             | 84.1   | 31f             | 88.1   | 31f             | 96.4   | 31f             | 85.3   | 31f             | 86.9   |
| 32f             | 55.2   | 32f             | 55.6   | 32f             | 68.5   | 32f             | 48.4   | 32f             | 78.0   | 32f             | 78.5   | 32f             | 87.8   | 32f             | 77.0   | 32f             | 76.9   |
| 33f             | 26.3   | 33f             | 50.5   | 33f             | 63.1   | 33f             | 36.4   | 33f             | 76.6   | 33f             | 8.8    | 33f             | 63.5   | 33f             | 72.6   | 33f             | 63.6   |
| 34f             | 9.8    | 34f             | 31.4   | 34f             | 31.9   | 34f/i           | 74.8   | 34f             | 60.2   | 34f/i           | 27.8   | 34f             | 48.7   | 34f             | 63.8   | 34f             | 40.8   |
| 35f/i           | 71.9   | 35f/i           | 24.5   | 35f/i           | 59.5   | 35f/i           | 81.9   | 35f/i           | 42.4   | 35f/i           | 54.7   | 35f/i           | 79.0   | 35f             | 45.6   | 35f/i           | 57.9   |
| 36f/i           | 1398.4 | 35f/i           | 200.5  | 36f/i           | 1007.0 | 36f/i           | 527.3  | 36f/i           | 434.7  | 36f/i           | 838.4  | 36f/i           | 413.6  | 36f/i           | 1208.7 | 36f/i           | 349.7  |

**Table S19.**

The results of frequency analysis of transition states on LaCuO-Cl surface

| TS <sub>1</sub> |        | TS <sub>2</sub> |        | TS <sub>3</sub> |        | TS <sub>4</sub> |        | TS <sub>7</sub> |        | TS <sub>5</sub> |        | TS <sub>6</sub> |        | TS <sub>8</sub> |        | TS <sub>9</sub> |        |
|-----------------|--------|-----------------|--------|-----------------|--------|-----------------|--------|-----------------|--------|-----------------|--------|-----------------|--------|-----------------|--------|-----------------|--------|
| 1f              | 3152.6 | 1f              | 3729.9 | 1f              | 3643.8 | 1f              | 3130.5 | 1f              | 3167.4 | 1f              | 3102.0 | 1f              | 3066.6 | 1f              | 3164.2 | 1f              | 3140.0 |
| 2f              | 3101.8 | 2f              | 3189.9 | 2f              | 3157.4 | 2f              | 3061.8 | 2f              | 3071.2 | 2f              | 3066.5 | 2f              | 3049.6 | 2f              | 3122.6 | 2f              | 3126.3 |
| 3f              | 3067.2 | 3f              | 3150.6 | 3f              | 3071.7 | 3f              | 3049.8 | 3f              | 3055.8 | 3f              | 3008.1 | 3f              | 3005.8 | 3f              | 3063.0 | 3f              | 3073.4 |
| 4f              | 3058.6 | 4f              | 3081.7 | 4f              | 2998.0 | 4f              | 3026.4 | 4f              | 3035.5 | 4f              | 2919.2 | 4f              | 2987.9 | 4f              | 3047.5 | 4f              | 3072.1 |
| 5f              | 3012.4 | 5f              | 3068.6 | 5f              | 2851.1 | 5f              | 2968.0 | 5f              | 3019.2 | 5f              | 2835.9 | 5f              | 2932.6 | 5f              | 3009.5 | 5f              | 3024.6 |
| 6f              | 1544.4 | 6f              | 3052.8 | 6f              | 1634.1 | 6f              | 2934.1 | 6f              | 2954.9 | 6f              | 2030.4 | 6f              | 2903.5 | 6f              | 2320.3 | 6f              | 2866.2 |
| 7f              | 1435.3 | 7f              | 1474.0 | 7f              | 1551.1 | 7f              | 1468.9 | 7f              | 1450.3 | 7f              | 1455.0 | 7f              | 1457.4 | 7f              | 1447.2 | 7f              | 1453.3 |
| 8f              | 1424.4 | 8f              | 1466.0 | 8f              | 1406.4 | 8f              | 1431.4 | 8f              | 1444.1 | 8f              | 1407.4 | 8f              | 1427.4 | 8f              | 1435.5 | 8f              | 1439.8 |
| 9f              | 1373.4 | 9f              | 1381.9 | 9f              | 1305.5 | 9f              | 1412.0 | 9f              | 1425.1 | 9f              | 1397.5 | 9f              | 1417.8 | 9f              | 1401.9 | 9f              | 1403.6 |
| 10f             | 1261.8 | 10f             | 1231.0 | 10f             | 1280.3 | 10f             | 1373.0 | 10f             | 1362.4 | 10f             | 1369.9 | 10f             | 1373.3 | 10f             | 1355.1 | 10f             | 1356.0 |
| 11f             | 1195.6 | 11f             | 1197.1 | 11f             | 1263.5 | 11f             | 1347.0 | 11f             | 1333.4 | 11f             | 1322.3 | 11f             | 1331.9 | 11f             | 1302.3 | 11f             | 1270.2 |
| 12f             | 1097.2 | 12f             | 1014.3 | 12f             | 1142.3 | 12f             | 1196.3 | 12f             | 1202.4 | 12f             | 1238.0 | 12f             | 1263.1 | 12f             | 1209.9 | 12f             | 1257.9 |
| 13f             | 1068.7 | 13f             | 984.4  | 13f             | 1097.8 | 13f             | 1165.9 | 13f             | 1148.3 | 13f             | 1116.0 | 13f             | 1170.3 | 13f             | 1057.8 | 13f             | 1136.1 |
| 14f             | 998.8  | 14f             | 905.3  | 14f             | 1018.0 | 14f             | 1091.1 | 14f             | 1141.6 | 14f             | 1092.9 | 14f             | 1164.0 | 14f             | 1006.1 | 14f             | 1109.2 |
| 15f             | 954.7  | 15f             | 811.2  | 15f             | 966.9  | 15f             | 989.1  | 15f             | 988.1  | 15f             | 1017.6 | 15f             | 1110.7 | 15f             | 969.6  | 15f             | 996.6  |
| 16f             | 939.2  | 16f             | 763.0  | 16f             | 926.7  | 16f             | 957.3  | 16f             | 946.0  | 16f             | 995.9  | 16f             | 1025.9 | 16f             | 896.0  | 16f             | 904.4  |
| 17f             | 914.6  | 17f             | 557.3  | 17f             | 895.3  | 17f             | 895.3  | 17f             | 916.6  | 17f             | 926.3  | 17f             | 942.6  | 17f             | 816.1  | 17f             | 892.5  |
| 18f             | 822.7  | 18f             | 544.2  | 18f             | 769.4  | 18f             | 875.8  | 18f             | 886.8  | 18f             | 900.9  | 18f             | 904.8  | 18f             | 757.4  | 18f             | 839.0  |
| 19f             | 643.5  | 19f             | 523.0  | 19f             | 653.5  | 19f             | 764.1  | 19f             | 653.7  | 19f             | 725.3  | 19f             | 884.0  | 19f             | 630.0  | 19f             | 778.1  |
| 20f             | 621.4  | 20f             | 408.5  | 20f             | 569.5  | 20f             | 636.8  | 20f             | 522.1  | 20f             | 675.0  | 20f             | 657.3  | 20f             | 552.9  | 20f             | 722.1  |
| 21f             | 464.5  | 21f             | 356.4  | 21f             | 468.0  | 21f             | 418.0  | 21f             | 492.2  | 21f             | 424.0  | 21f             | 403.3  | 21f             | 476.5  | 21f             | 544.7  |
| 22f             | 362.3  | 22f             | 316.2  | 22f             | 418.3  | 22f             | 358.3  | 22f             | 394.4  | 22f             | 338.0  | 22f             | 384.2  | 22f             | 380.8  | 22f             | 394.6  |
| 23f             | 282.2  | 23f             | 295.4  | 23f             | 375.5  | 23f             | 336.2  | 23f             | 302.2  | 23f             | 285.4  | 23f             | 309.8  | 23f             | 339.3  | 23f             | 373.6  |
| 24f             | 266.0  | 24f             | 184.4  | 24f             | 288.6  | 24f             | 270.1  | 24f             | 239.0  | 24f             | 270.6  | 24f             | 279.5  | 24f             | 310.1  | 24f             | 333.5  |
| 25f             | 212.3  | 25f             | 181.5  | 25f             | 247.0  | 25f             | 212.3  | 25f             | 218.8  | 25f             | 201.9  | 25f             | 224.6  | 25f             | 218.3  | 25f             | 250.5  |
| 26f             | 188.7  | 26f             | 157.3  | 26f             | 197.1  | 26f             | 175.8  | 26f             | 202.3  | 26f             | 166.6  | 26f             | 173.0  | 26f             | 192.4  | 26f             | 193.3  |
| 27f             | 172.4  | 27f             | 145.2  | 27f             | 150.1  | 27f             | 142.3  | 27f             | 189.1  | 27f             | 146.9  | 27f             | 171.1  | 27f             | 169.0  | 27f             | 171.8  |
| 28f             | 141.6  | 28f             | 115.7  | 28f             | 129.3  | 28f             | 115.0  | 28f             | 178.9  | 28f             | 142.5  | 28f             | 121.6  | 28f             | 165.5  | 28f             | 165.3  |
| 29f             | 116.7  | 29f             | 89.1   | 29f             | 88.6   | 29f             | 101.6  | 29f             | 114.9  | 29f             | 120.5  | 29f             | 118.8  | 29f             | 141.4  | 29f             | 147.2  |
| 30f             | 104.5  | 30f             | 76.0   | 30f             | 74.4   | 30f             | 77.6   | 30f             | 113.9  | 30f             | 96.3   | 30f             | 104.4  | 30f             | 123.5  | 30f             | 120.2  |
| 31f             | 83.7   | 31f             | 51.2   | 31f             | 61.0   | 31f             | 65.7   | 31f             | 86.0   | 31f             | 51.1   | 31f             | 87.0   | 31f             | 99.5   | 31f             | 84.4   |
| 32f             | 80.7   | 32f             | 48.7   | 32f             | 51.3   | 32f             | 48.9   | 32f             | 80.8   | 32f             | 47.5   | 32f             | 75.0   | 32f             | 85.1   | 32f             | 58.2   |
| 33f             | 65.0   | 33f             | 46.7   | 33f             | 32.6   | 33f             | 24.3   | 33f             | 49.2   | 33f             | 28.0   | 33f             | 53.1   | 33f             | 74.1   | 33f             | 52.4   |
| 34f             | 25.4   | 34f             | 27.5   | 34f             | 16.8   | 34f             | 58.2   | 34f             | 29.3   | 34f/i           | 34.7   | 34f             | 46.7   | 34f             | 45.8   | 34f             | 15.9   |
| 35f/i           | 12.2   | 35f             | 26.6   | 35f/i           | 38.9   | 35f/i           | 23.3   | 35f/i           | 56.7   | 35f/i           | 86.8   | 35f/i           | 34.1   | 35f/i           | 67.3   | 35f             | 42.8   |
| 36f/i           | 1247.1 | 36f/i           | 155.0  | 36f/i           | 832.1  | 36f/i           | 499.4  | 36f/i           | 425.4  | 36f/i           | 1080.2 | 36f/i           | 472.1  | 36f/i           | 1236.2 | 36f/i           | 303.8  |
